# Supplementary material for: The pattern of apolipoprotein A-I lysine carbamylation reflects its lipidation state and the chemical environment within human atherosclerotic aorta
Source: PubMed Central journal article supplement (PMC9010765; doi:10.1016/j.jbc.2022.101832), 2022-03-15
Supplement: mmc1.pdf [file mmc1.pdf]

## Supporting Information

The pattern of apolipoprotein A-I lysine carbamylation reflects its lipidation state and the chemical environment within human atherosclerotic aorta

Shawna Battle<sup>1,2</sup>, Valentin Gogonea<sup>1,3</sup>, Belinda Willard<sup>4</sup>, Zeneng Wang<sup>1,2</sup>, Xiaoming Fu<sup>1</sup>, Ying Huang<sup>1</sup>, Linda M. Graham<sup>2,5,6</sup>, Scott J. Cameron<sup>1,2,6,7</sup>, Joseph A. DiDonato<sup>1,2</sup>, John W. Crabb<sup>2,8</sup>, and Stanley L. Hazen<sup>1,2,3,6</sup>

<sup>1</sup> Department of Cardiovascular & Metabolic Sciences, Cleveland Clinic, Cleveland, OH

<sup>2</sup> Cleveland Clinic Lerner College of Medicine, Case Western Reserve University, Cleveland, OH

<sup>3</sup> Department of Chemistry, Cleveland State University, Cleveland, OH

<sup>4</sup> Proteomics Shared Laboratory Resource, Cleveland Clinic, Cleveland, OH

<sup>5</sup> Department of Biomedical Engineering, Lerner Research Institute, Cleveland Clinic, Cleveland, OH, USA

<sup>6</sup> Heart Vascular and Thoracic Institute, Cleveland Clinic, Cleveland, OH

<sup>7</sup> Taussig Cancer Center, Cleveland Clinic, Cleveland, OH

<sup>8</sup> Cole Eye Institute, Cleveland Clinic, Cleveland, OH

Address correspondence to:

Stanley Hazen, Dept. of Cardiovascular and Metabolic Sciences/NC10, Lerner Research Institute, Cleveland Clinic, 9500 Euclid Ave., Cleveland, OH 44195. Tel.: 216-445-9763; Fax: 216-444-9404; E-mail: [hazens@ccf.org](mailto:hazens@ccf.org).

## Table of Contents

| Figure/ Table  | Title                                                                                                                                                                                                             | Page    |
|----------------|-------------------------------------------------------------------------------------------------------------------------------------------------------------------------------------------------------------------|---------|
| Table S1       | Demographics and laboratory values of Clinical Cohort used in the analysis of protein bound HCit content in plasma                                                                                                | 3       |
| Table S2       | Age and gender of subjects from whom human atherosclerotic aortic samples were used in recovery of apoA-I for proteomic analysis                                                                                  | 4       |
| Table S3       | Peptide search parameters for Proteome Discoverer program                                                                                                                                                         | 5       |
| Table S4       | Abundance and frequencies of detection of reference peptide candidates used in the proteomic analysis                                                                                                             | 6 - 7   |
| Table S5       | <i>In vitro</i> CNO- modified rHDL/apoA-I peptides containing carbamylated lysine residues detected in the proteomic analyses                                                                                     | 8       |
| Table S6       | <i>In vitro</i> MPO modified rHDL / apoA-I peptides containing carbamylated lysine residues detected in the proteomic analysis                                                                                    | 9       |
| Table S7       | <i>In vitro</i> CNO- modified lipid poor apoA-I peptides containing carbamylated lysine residues detected in the proteomic analysis                                                                               | 10      |
| Table S8       | <i>In vitro</i> MPO modified lipid poor apoA-I peptides containing carbamylated lysine residues detected in the proteomic analysis                                                                                | 11      |
| Table S9       | Human atherosclerotic aorta apoA-I peptides containing carbamylated lysine residues detected by the proteomic analysis                                                                                            | 12-13   |
| Table S10      | Xcorr Sequest scores for Human atherosclerotic lesion apoA-I peptides containing carbamylated lysine residues detected during proteomic analyses                                                                  | 14 - 15 |
| Table S11      | Kinetic and binding affinity data for lipid poor apoA-I binding to MPO determined by Surface Plasmon Resonance spectroscopy                                                                                       | 16      |
| Table S12      | PRIDE accessible raw file names for <i>in- vitro</i> modified apoA-I and apoA-I isolated from human lesion samples used in the proteomics analysis                                                                | 17-19   |
| Figure S1      | Characterization of rHDL particles                                                                                                                                                                                | 19      |
| Figure S2      | Western blot analysis of lipid poor apoA-I crosslinked with MPO                                                                                                                                                   | 20      |
| Figure S3      | Quantification of carbamylated lysine residues in lipid poor apoA-I modified <i>in vitro</i> by the MPO or CNO <sup>-</sup> system                                                                                | 21      |
| Figure S4      | Quantification of site-specific carbamylation of apoA-I recovered from human atherosclerotic aorta                                                                                                                | 22      |
| Figure S5      | Lysine carbamylation sites identified by the proteomic analysis of rHDL and lipid poor apoA-I modified <i>in vitro</i> by CNO <sup>-</sup>                                                                        | 23      |
| Figure S6-S22  | Annotated MS/MS spectra, table of fragmentation ions, and table indicating where detected ( <i>in vivo</i> and <i>in vitro</i> samples) for each human apoA-I peptide detected harboring a carbamyllysine residue | 24-40   |
| Figure S23-S26 | Annotated MS/MS spectra and tables of fragmentation ions for apoA-I reference peptides                                                                                                                            | 41-44   |

**Table S1. Demographics and laboratory values of the clinical cohort subset (GeneBank, GB) used in the analysis of protein bound HCit content in plasma.**

| Characteristics                    | GB subset<br>(n=117) |
|------------------------------------|----------------------|
| Age (yr)                           | 60.7(55.6-66.5)      |
| Sex (% male)                       | 45.6                 |
| SBP (mmHg)                         | 131.0(120.0-144.0)   |
| HgbA1C (%)                         | 5.5(5.2-5.9)         |
| HDLc (mg/dL)                       | 38.8(32.0-48.0)      |
| LDLc (mg/dL)                       | 105.0(87.0-123.0)    |
| Cholesterol (mg/dL)                | 171.4(151.9-194.3)   |
| Triglyceride (mg/dL)               | 97.5(77.3-140.8)     |
| eGFR (mL/min/1.73 m <sup>2</sup> ) | 80.4(70.3-91.4)      |
| CRP (mg/dL)                        | 1.74(0.86-4.57)      |

Clinical and laboratory characteristics of GB subjects (n=117) for whom protein-bound HCit was quantified in plasma proteins. Subjects included were confirmed to be without known cardiovascular or metabolic diseases, and with normal renal function, as described under Experimental Procedures. Plasma was analyzed for protein bound HCit content using stable isotope dilution LC/MS/MS methods as described. Values shown are median (interquartile range) for continuous variables, and percent for dichotomous variables.

Abbreviations: Systolic blood pressure (SBP), hemoglobinA1C (HgbA1C), high density lipoprotein cholesterol (HDLc), low density lipoprotein cholesterol (LDLc), estimated glomerular filtration rate (eGFR), C-reactive protein (CRP)

**Table S2. Age and gender of subjects from whom human atherosclerotic aortic samples were used in recovery of apoA-I for proteomic analysis.**

| Human aorta sample | Age | Gender | Sequence coverage % |
|--------------------|-----|--------|---------------------|
| 1                  | 79  | Male   | 93                  |
| 2                  | 76  | Female | 93                  |
| 3                  | 74  | Male   | 93                  |
| 4                  | 81  | Male   | 90                  |
| 5                  | 76  | Male   | 90                  |
| 6                  | 75  | Female | 93                  |
| 7                  | 73  | Female | 92                  |
| 8                  | 68  | Female | 90                  |
| 9                  | 82  | Female | 90                  |
| 10                 | 71  | Male   | 90                  |

Human aortic tissue was obtained as discarded material at time of organ removal from transplant recipients. Atherosclerotic donor tissues were from subjects (n=10) of average age 75yr +/- 4yr. Both males and females were analyzed. ApoA-I was immunoprecipitated from aortic tissue homogenates using a cocktail of anti-apoA-I antibodies using methods shown to result in quantitative recovery of total apoA-I from samples, as described under Experimental Procedures. Recovered apoA-I protein was subjected to proteolysis with GluC and mass spectrometry was performed as described under Experimental Procedures. Proteome Discoverer 2.3 was used to identify peptide sequences and % coverage.

**Table S3. Peptide search parameters for Proteome Discoverer.**

|                                                       |
|-------------------------------------------------------|
| <b>Protein Database: ApoA1_His.fasta</b>              |
| - Enzyme Name: GluC                                   |
| - Maximum Missed Cleavage Sites: 5                    |
|                                                       |
| <b>Tolerances:</b>                                    |
| - Precursor Mass Tolerance: 10 ppm                    |
| - Fragment Mass Tolerance: 0.6 Da                     |
| - Max. Identical Dynamic Modifications Per Peptide: 3 |
| - Max. Dynamic Modifications Per Peptide: 4           |
|                                                       |
| <b>Fixed Value PSM Validator:</b>                     |
| Maximum Delta Cn: 0.05                                |
| Maximum Rank: 0                                       |
|                                                       |
| <b>Protein FDR Validator:</b>                         |
| Target FDR (Strict): 0.01                             |
| Target FDR (Relaxed): 0.05                            |
|                                                       |
| <b>Dynamic Modification:</b>                          |
| - Oxidation / +15.995 Da (M, W)                       |
| - Carbamylation / +43.006 Da (K)                      |
| - Acetylation / +42.001 Da (K)                        |

Peak lists were generated with Proteome Discoverer 2.3 (Thermo Fischer Scientific, Waltham, MA) using the parameters listed. The resulting Unified Search Files (\*.srf) were searched against the Uniprot FASTA of human apoA-I. Modifications used for the searches included, oxidized methionine (variable), oxidized tryptophan (variable), carbamylated lysine (variable, mass addition 43 Da) and acetylated lysine (variable). GluC peptides with a maximum of 5 missed cleavage sites were allowed in the database searches. Monoisotopic precursor ions were searched with a tolerance of 10 ppm with 0.6 Da for the fragment ions.

**Table S4. Abundance and frequency of detection of reference peptide candidates used in the proteomic analysis.**

| Reference peptide candidate               |                                                                         | Sample   |          |                       |          |            |           |                         |          |              |          |
|-------------------------------------------|-------------------------------------------------------------------------|----------|----------|-----------------------|----------|------------|-----------|-------------------------|----------|--------------|----------|
|                                           |                                                                         | rHDL+MPO |          | rHDL+CNO <sup>-</sup> |          | apoA-I+MPO |           | apoA-I+CNO <sup>-</sup> |          | Human plaque |          |
|                                           |                                                                         | RPA (%)  | DFRP (%) | RPA (%)               | DFRP (%) | RPA (%)    | DFR P (%) | RPA (%)                 | DFRP (%) | RPA (%)      | DFRP (%) |
| Cluster 1 of reference peptide candidates |                                                                         |          |          |                       |          |            |           |                         |          |              |          |
| 1A                                        | <sup>213</sup> DLRQ<br>GLLPVL<br>E <sup>223</sup>                       | 99±0.2   | 100      | 66±12                 | 100      | 82±0.5     | 100       | 87±1                    | 100      | 98±0.4       | 100      |
| 1B                                        | <sup>206</sup> KAKP<br>ALEDLR<br>QGLLPV<br>LE <sup>223</sup>            | 1±0.2    | 100      | 22±6                  | 100      | 14±0.9     | 100       | 11±1                    | 100      | 2±0.4        | 100      |
| 1C                                        | <sup>199</sup> HLSTL<br>SEKAKP<br>ALEDLR<br>QGLLPV<br>LE <sup>223</sup> | <0.001   | 100      | 12±6                  | 100      | 4±0.4      | 100       | 2±0.1                   | 100      | <0.1±.01     | 80       |
| Cluster 2 of reference peptide candidates |                                                                         |          |          |                       |          |            |           |                         |          |              |          |
| 2A                                        | <sup>79</sup> TEGLR<br>QE <sup>85</sup>                                 | 100±0    | 100      | 100±0                 | 100      | 4±0.3      | 100       | 6±0.5                   | 67       | 79±15        | 100      |
| 2B                                        | <sup>81</sup> GLRQE<br>MSKDLE<br>91                                     | <0.001   | 100      | <0.001                | 100      | 96±0.3     | 100       | 94±0.5                  | 100      | 9±5.6        | 100      |
| 2C                                        | <sup>79</sup> TEGLR<br>QEMSK<br>D <sup>89</sup>                         | <0.001   | 100      | <0.001                | 100      | <0.001     | 100       | <0.001                  | 100      | 12±13        | 100      |
| Cluster 3 of reference peptide candidates |                                                                         |          |          |                       |          |            |           |                         |          |              |          |
| 3A                                        | <sup>184</sup> NGGA<br>RLAE <sup>191</sup>                              | <0.1±0.1 | 100      | 0.3±0.1               | 100      | 11±4.6     | 100       | 35±1.3                  | 67       | 68±16        | 100      |
| 3B                                        | <sup>180</sup> ALKE<br>NGGARL<br>AE <sup>191</sup>                      | 99±0.1   | 100      | 99±0.1                | 100      | 89±4.6     | 100       | 65±1.2                  | 67       | 32±16        | 100      |
| Cluster 4 of reference peptide candidates |                                                                         |          |          |                       |          |            |           |                         |          |              |          |
| 4A                                        | <sup>63</sup> QLGPV<br>TQE <sup>70</sup>                                | 24±30    | 100      | 26±24                 | 67       | 62±3.5     | 100       | 21±2                    | 100      | 99±0.1       | 100      |

|                                           |                                                                                                      |        |     |       |     |         |     |        |     |          |    |
|-------------------------------------------|------------------------------------------------------------------------------------------------------|--------|-----|-------|-----|---------|-----|--------|-----|----------|----|
| 4B                                        | <sup>63</sup> QLG <b>PV</b><br>TQEFW<br>DNLEKE<br>78                                                 | <0.001 | 100 | 17±15 | 100 | 1.0±0.1 | 100 | <0.001 | 100 | <0.1±0.1 | 70 |
| 4C                                        | <sup>35</sup> GSALG<br>KQLNLK<br>LLDNWD<br>SVTSTF<br>SKLREQ<br>LGPVTQ<br>EFWDNL<br>EKE <sup>78</sup> | 76±30  | 100 | 65±11 | 100 | 37±3.5  | 100 | 79±2   | 100 | 0.5±0.6  | 90 |
| Cluster 5 of reference peptide candidates |                                                                                                      |        |     |       |     |         |     |        |     |          |    |
| 5A                                        | <sup>71</sup> FWDNL<br>E <sup>76</sup>                                                               | -      | -   | -     | -   | 1±0.1   | 100 | 1±0.1  | 100 | -        | -  |
| 5B                                        | <sup>71</sup> FWDNL<br>EKE <sup>78</sup>                                                             | -      | -   | -     | -   | 56±0.4  | 100 | 55±0.9 | 100 | -        | -  |
| 5C                                        | <sup>71</sup> FWDNL<br>EKETE <sup>80</sup>                                                           | -      | -   | -     | -   | 43±0.5  | 100 | 44±1   | 100 | -        | -  |

To select optimal apoA-I peptides that might serve as an internal reference peptide for relative quantification of carbamyllysine harboring apoA-I peptides in samples, we used the following criteria: 1) the reference peptide candidate doesn't contain lysine residues and if possible, methionine, histidine, or other nucleophilic or oxidizable residues; 2) the reference peptide candidate should be readily detectable in all sample replicates; 3) the reference peptide candidate should be readily detectable in all samples from all analyses groups (i.e. rHDL + MPO; rHDL + CNO<sup>-</sup>; apoA-I + MPO; apoA-I + CNO<sup>-</sup>; and Human plaque).

RPA (%) = average reference peptide candidate abundance ± standard deviation = 100 X (peak area of reference peptide candidates / (sum of peak areas of reference peptide candidates in the same peptide cluster, (e.g. peptides 1A, 1B, 1C from reference peptide candidates cluster 1))).

DFRP (%) = detection frequency of reference peptide candidate = 100 x (number of times reference peptide candidate was observed in replicate samples / total of replicate samples). The DFRP is listed in bold face if the reference peptide was not seen in all replicates and therefore its priority for use was reduced.

(-) indicates reference peptide candidate not used in analysis.

We observed similar qualitative results, whether using three different single reference peptides, vs. a weighted average of the top three performing reference peptides (e.g. see Figure S3, and S4). However, based on the data analyses shown above, we also noted that only reference peptide D<sub>213</sub>-E<sub>223</sub> showed optimal characteristics (i.e. it was the only reference peptide observed in all *in vitro* and *in vivo* samples). We therefore elected to use this internal reference peptide as the denominator for all apoA-I quantifications.

**Table S5. *In vitro* CNO<sup>-</sup> modified rHDL/apoA-I peptides containing carbamylated lysine residues detected in the proteomic analyses**

| Peptide Sequence                                                                     | m/z     | Charge | $\Delta m$<br>(ppm) | Xcorr Sequest<br>Score |
|--------------------------------------------------------------------------------------|---------|--------|---------------------|------------------------|
| GSALGKQLNLK <sub>45</sub> LLDNWDSVTSTFSKLRE                                          | 791.67  | 4      | -0.2                | 5.89                   |
| VK <sub>94</sub> AKVQPYLDDFQKKWQEE                                                   | 808.08  | 3      | -1.58               | 3.04                   |
| MELYRQK <sub>118</sub> VEPLRAELQE                                                    | 725.71  | 3      | 0.08                | 3.22                   |
| LYRQK <sub>118</sub> VEPLRAE                                                         | 515.62  | 3      | -0.32               | 2.91                   |
| LYRQK <sub>118</sub> VEPLRAELQE                                                      | 639.01  | 3      | 0.03                | 3.4                    |
| ALK <sub>182</sub> ENGGARLAE                                                         | 636.33  | 2      | -0.5                | 3.14                   |
| SFK <sub>226</sub> VSFLSALEEYTKKLNTQ                                                 | 792.75  | 3      | 1.1                 | 4.95                   |
| SFK <sub>226</sub> VSFLSALEE                                                         | 700.35  | 2      | 0.09                | 3.98                   |
| YTKK <sub>239</sub> LNTQ                                                             | 519.78  | 2      | 0.19                | 2.44                   |
| GSALGK <sub>40</sub> QLNLK <sub>45</sub> LLDNWDSVTSTFSK <sub>59</sub><br>LREQLGPVTQE | 1004.78 | 4      | 0.44                | 5.14                   |
| Reference peptide candidates                                                         |         |        |                     |                        |
| <sup>213</sup> DLRQGLLPVLE <sup>223</sup>                                            | 626.86  | 2      | -0.85               | 2.84                   |
| <sup>79</sup> TEGLRQE <sup>85</sup>                                                  | 416.71  | 2      | 0.32                | 2.82                   |
| <sup>184</sup> NGGARLAE <sup>191</sup>                                               | 394.20  | 2      | -0.86               | 3.03                   |

LC-MS/MS analysis of GluC digests from *in vitro* modified rHDL (CNO<sup>-</sup>) preparations yielded identification of  $\geq 90\%$  of apoA-I protein sequence (Table S2). Peptide sequence, m/z,  $\Delta m$ , charge and Xcorr produced by Proteome Discoverer for the *in vitro* CNO<sup>-</sup> modified rHDL/apoA-I peptides containing carbamylated lysine residues included in the proteomic analysis are listed above.

Carbamylated lysine residue within the peptide sequence is shown in red.

m/z = the ratio of the mass (Da) and the charge (a.u.) of the digested peptide.

$\Delta m$  = mass difference (ppm) between measured peptide and its theoretical mass.

Charge (positive ion mode) = peptide charge (a.u.).

Xcorr (Proteome Discoverer) = cross-correlation value from the search.



**Table S6. *In vitro* MPO modified rHDL/apoA-I peptides containing carbamylated lysine residues detected in the proteomic analysis.**

| Peptide Sequence                           | m/z    | Charge | $\Delta m$<br>(ppm) | Xcorr Sequest<br>Score |
|--------------------------------------------|--------|--------|---------------------|------------------------|
| LATVYVDVLR <sub>K23</sub> DSGRDYVSQFE      | 816.40 | 3      | -2.07               | 4.82                   |
| GSALGK <sub>40</sub> QLNLKLLDNWDSVTSTFSKLR | 791.67 | 4      | -0.2                | 6.38                   |
| VK <sub>94</sub> AKVQPYLDDFQKKWQEE         | 808.08 | 3      | -1.58               | 3.7                    |
| LYRQK <sub>118</sub> VEPLRAE               | 515.62 | 3      | 3.83                | 2.88                   |
| YHAK <sub>195</sub> ATEHLSTLSEKAKP         | 524.77 | 4      | -0.02               | 1.78                   |
| SFK <sub>226</sub> VSFLSALEE               | 700.35 | 2      | -2.53               | 4.43                   |
| YTK <sub>238</sub> KLNTQ                   | 519.78 | 2      | -0.99               | 2.71                   |
| Reference peptide candidates               |        |        |                     |                        |
| <sup>213</sup> DLRQGLLPVLE <sup>223</sup>  | 626.86 | 2      | -0.85               | 3.03                   |
| <sup>79</sup> TEGLRQE <sup>85</sup>        | 416.71 | 2      | 0.32                | 2.48                   |
| <sup>184</sup> NGGARLAE <sup>191</sup>     | 394.20 | 2      | -0.86               | 2.95                   |

LC-MS/MS analysis of GluC digests from *in vitro* modified rHDL (MPO) preparations yielded identification of  $\geq 90\%$  of apoA-I protein sequence. Peptide sequence, m/z,  $\Delta m$ , charge and Xcorr produced by Proteome Discoverer are listed above.

Carbamylated lysine residue is shown in red.

m/z = the ratio of the mass (Da) and the charge (a.u.) of the digested peptide.

$\Delta m$  = mass difference (ppm) between measured peptide and its theoretical mass.

Charge (positive ion mode) = peptide charge (a.u.).

Xcorr (Proteome Discoverer) = cross-correlation value from the search.

**Table S7. *In vitro* CNO<sup>-</sup> modified lipid poor apoA-I peptides containing carbamylated lysine residues detected in the proteomic analysis.**

| Peptide Sequence                                                   | m/z     | Charge | $\Delta m$ (ppm) | Xcorr Sequest Score |
|--------------------------------------------------------------------|---------|--------|------------------|---------------------|
| LATVYVDVLK <sub>23</sub> DSGRDYVSQFE                               | 816.40  | 3      | -2.07            | 3.05                |
| GSALGK <sub>40</sub> QLNLKLLDNWDSVTSTFSKLREQ<br>LGPVTQE            | 1004.78 | 4      | -0.59            | 5.07                |
| VK <sub>94</sub> AKVQPYLDDFQKKWQEE                                 | 808.08  | 3      | -1.58            | 4.58                |
| LYRQK <sub>118</sub> VEPLRAELQE                                    | 639.01  | 3      | -1.02            | 3.87                |
| LYRQK <sub>118</sub> VEPLRAE                                       | 515.62  | 3      | 3.83             | 3.06                |
| YHAK <sub>195</sub> ATEHLSTLSE                                     | 543.93  | 3      | -2.22            | 1.44                |
| SFK <sub>226</sub> VSFLSALEE                                       | 700.35  | 2      | -2.53            | 3.58                |
| VKAK <sub>96</sub> VQPYLDDFQK <sub>106</sub> K <sub>107</sub> WQEE | 836.76  | 3      | 8.17             | 1.22                |
| GSALGK <sub>40</sub> QLNLKLLDNWDSVTSTFSK <sub>59</sub><br>LRE      | 1055.22 | 3      | -1.37            | 7.01                |
| Reference peptide candidates                                       |         |        |                  |                     |
| <sup>213</sup> DLRQGLLPVLE <sup>223</sup>                          | 626.86  | 2      | -0.85            | 2.85                |
| <sup>63</sup> QLGPVTQE <sup>70</sup>                               | 436.22  | 2      | -1.78            | 2.5                 |
| <sup>71</sup> FWDNLE <sup>78</sup>                                 | 823.36  | 1      | -0.86            | 1.87                |

LC-MS/MS analysis of GluC digests from *in vitro* CNO<sup>-</sup> modified lipid poor apoA-I preparations yielded identification of  $\geq 90\%$  of apoA-I protein sequence. Peptide sequence, m/z,  $\Delta m$ , charge and Xcorr produced by Proteome Discoverer are listed above.

Carbamylated lysine residue is shown in red.

m/z = the ratio of the mass (Da) and the charge (a.u.) of the digested peptide.

$\Delta m$  = mass difference (ppm) between measured peptide and its theoretical mass.

Charge (positive ion mode) = peptide charge (a.u.).

Xcorr (Proteome Discoverer) = cross-correlation value from the search.

**Table S8. *In vitro* MPO modified lipid poor apoA-I peptides containing carbamylated lysine residues detected in the proteomic analysis.**

| Peptide Sequence                                                                | m/z     | charge | $\Delta m$<br>(ppm) | Xcorr<br>Sequest<br>Score |
|---------------------------------------------------------------------------------|---------|--------|---------------------|---------------------------|
| GSALG <sup>K<sub>40</sub></sup> QLNLKLLDNWDSVTSTFSKLRE                          | 791.67  | 4      | 0.03                | 6.31                      |
| GSALG<br><sup>K<sub>40</sub></sup> QLNLKLLDNWDSVTSTFSKLREQLGPVTQE               | 1004.78 | 4      | -0.59               | 4.83                      |
| LYRQ <sup>K<sub>118</sub></sup> VEPLRAE                                         | 515.62  | 3      | -3.17               | 2.88                      |
| YHA <sup>K<sub>195</sub></sup> ATEHLSTLSE                                       | 543.93  | 3      | -1.65               | 1.24                      |
| SGRDYVSQFEGSALG <sup>K<sub>40</sub></sup> QLNL <sup>K<sub>45</sub></sup> LLDNWD | 1047.18 | 3      | 2.67                | 1.48                      |
| Reference peptide candidates                                                    |         |        |                     |                           |
| <sup>213</sup> DLRQGLLPVLE <sup>223</sup>                                       | 626.86  | 2      | -0.85               | 2.94                      |
| <sup>63</sup> QLGPVTQE <sup>70</sup>                                            | 436.22  | 2      | -1.78               | 2.51                      |
| <sup>71</sup> FWDNLE <sup>78</sup>                                              | 823.36  | 1      | -0.86               | 1.85                      |

LC-MS/MS analysis of GluC digests from *in vitro* modified (MPO) lipid poor apoA-I preparations yielded identification of  $\geq 90\%$  of apoA-I protein sequence. Peptide sequence, m/z,  $\Delta m$ , charge and Xcorr produced by Proteome Discoverer are listed above.

Carbamylated lysine residue is shown in red.

m/z = the ratio of the mass (Da) and the charge (a.u.) of the digested peptide.

$\Delta m$  = mass difference (ppm) between measured peptide and its theoretical mass.

Charge (positive ion mode) = peptide charge (a.u.).

Xcorr (Proteome Discoverer) = cross-correlation value from the search.

**Table S9. Human atherosclerotic aorta apoA-I peptides containing carbamylated lysine residues detected by the proteomic analysis.**

| Peptide Sequence                                                | m/z    | Charge | $\Delta m$ (ppm) |
|-----------------------------------------------------------------|--------|--------|------------------|
| DEPPQSPWDRV <b>K</b> <sub>12</sub> D                            | 537.92 | 3      | -2.65            |
| LATVYVDVL <b>K</b> <sub>23</sub> D                              | 639.85 | 2      | -1.41            |
| VL <b>K</b> <sub>23</sub> DSGRDYVSQFE                           | 843.41 | 2      | -4               |
| VYVDVL <b>K</b> <sub>23</sub> DSGRDYVSQFE                       | 1081.5 | 2      | 1.15             |
| LATVYVDVL <b>K</b> <sub>23</sub> DSGRDYVSQFE                    | 816.41 | 3      | 0.1              |
| GSALG <b>K</b> <sub>40</sub> QLN                                | 465.75 | 2      | -2.0             |
| GSALG <b>K</b> <sub>40</sub> QLNLK                              | 586.34 | 2      | 0.64             |
| ALG <b>K</b> <sub>40</sub> QLNLKLLDNWDSVTSTF <b>S</b> KLRE      | 766.41 | 4      | -5.44            |
| SALG <b>K</b> <sub>40</sub> QLNLKLLDNWDSVTSTF <b>S</b> KLRE     | 1036.2 | 3      | -3.33            |
| GSALG <b>K</b> <sub>40</sub> QLNLKLLD                           | 504.96 | 3      | -2.19            |
| GSALGKQLNL <b>K</b> <sub>45</sub> LLDNWDSVTS                    | 1151.6 | 2      | -0.89            |
| LNL <b>K</b> <sub>45</sub> LLDNWDSVTSTF <b>S</b> KLRE           | 841.45 | 3      | 0.63             |
| QFEGSALGKQLNL <b>K</b> <sub>45</sub> LLDNWDSVTSTF <b>S</b> KLRE | 714.38 | 5      | 1.16             |
| WDSVTSTF <b>S</b> <b>K</b> <sub>59</sub> LRE                    | 799.89 | 2      | -1.97            |
| NWDSVTSTF <b>S</b> <b>K</b> <sub>59</sub> LRE                   | 856.91 | 2      | -0.96            |
| LKLLDNWDSVTSTF <b>S</b> <b>K</b> <sub>59</sub> LRE              | 765.74 | 3      | 1.03             |
| NLKLLDNWDSVTSTF <b>S</b> <b>K</b> <sub>59</sub> LRE             | 803.75 | 3      | -3.54            |
| GSALGKQLNLKLLDNWDSVTSTF <b>S</b> <b>K</b> <sub>59</sub> L       | 960.18 | 3      | 0.20             |
| FWDNLE <b>K</b> <sub>77</sub> ETE                               | 677.3  | 2      | -1.16            |
| GLRQEM <b>S</b> <b>K</b> <sub>88</sub> DLEE                     | 747.35 | 2      | -0.78            |
| TEGLRQEM <b>S</b> <b>K</b> <sub>88</sub> DLEE                   | 862.39 | 2      | -0.71            |
| V <b>K</b> <sub>94</sub> AKVQPYLD                               | 602.34 | 2      | -2.07            |
| V <b>K</b> <sub>94</sub> AKVQPYLDD                              | 659.85 | 2      | -2.05            |
| V <b>K</b> <sub>96</sub> AKVQPYLD                               | 602.34 | 2      | 0.97             |
| FQ <b>K</b> <sub>107</sub> WQEE                                 | 583.28 | 2      | -1.36            |
| YR <b>Q</b> <b>K</b> <sub>118</sub> VEPLRAE                     | 477.93 | 3      | -1.53            |
| LYR <b>Q</b> <b>K</b> <sub>118</sub> VEPLRAE                    | 515.62 | 3      | -2.45            |
| MELYR <b>Q</b> <b>K</b> <sub>118</sub> VEPLRAE                  | 602.32 | 3      | -1.84            |
| MELYR <b>Q</b> <b>K</b> <sub>118</sub> VEPLRAELQE               | 725.71 | 3      | -3.2             |
| LQE <b>K</b> <sub>140</sub> LSPLGEE                             | 643.33 | 2      | -0.60            |
| <b>K</b> <sub>140</sub> LSPLGEE <b>M</b> RD                     | 667.32 | 2      | -1.82            |
| AL <b>K</b> <sub>182</sub> ENGARLAE                             | 636.33 | 2      | -7.60            |
| K <b>A</b> <b>K</b> <sub>208</sub> PALE                         | 400.24 | 2      | -3.08            |
| SF <b>K</b> <sub>226</sub> VSFL                                 | 435.74 | 2      | -1.13            |
| SF <b>K</b> <sub>226</sub> VSFLSA                               | 514.77 | 2      | 0.54             |

| Peptide Sequence (Table S9 Continued)                                               | m/z    | charge | $\Delta m$ (ppm) |
|-------------------------------------------------------------------------------------|--------|--------|------------------|
| SFK <sub>226</sub> VSFLSAL                                                          | 571.32 | 2      | 2.23             |
| K <sub>226</sub> VSFLSALEE                                                          | 583.31 | 2      | -1.17            |
| SFK <sub>226</sub> VSFLSALE                                                         | 635.84 | 2      | -1.64            |
| FK <sub>226</sub> VSFLSALEE                                                         | 656.84 | 2      | -0.99            |
| SFK <sub>226</sub> VSFLSALEE                                                        | 700.36 | 2      | -0.61            |
| YTKK <sub>239</sub> LNT                                                             | 455.75 | 2      | 0.53             |
| YTKK <sub>239</sub> LNTQ                                                            | 519.78 | 2      | -1.81            |
| K <sub>40</sub> QLNLK <sub>45</sub> LLDNWDSVTSTFSKLRE                               | 706.12 | 4      | -2.25            |
| SALGK <sub>40</sub> QLNLK <sub>45</sub> LLDNWDSVTSTFSKLRE                           | 788.17 | 4      | -0.5             |
| GSALGK <sub>40</sub> QLNLK <sub>45</sub> LLDNWDSVTSTF                               | 850.78 | 3      | -0.71            |
| GSALGK <sub>40</sub> QLNLK <sub>45</sub> LLDNWDSVTSTFSK <sub>59</sub> LRE           | 791.68 | 4      | 1.81             |
| VK <sub>94</sub> AK <sub>96</sub> VQPYLDDFQK <sub>106</sub> K <sub>107</sub> WQEE   | 808.08 | 3      | -0.90            |
| EVK <sub>94</sub> AK <sub>96</sub> VQPYLDDFQ K <sub>106</sub> K <sub>107</sub> WQEE | 851.1  | 3      | -0.69            |
| Reference peptide candidates                                                        |        |        |                  |
| <sup>63</sup> QLGPVTQE <sup>70</sup>                                                | 436.21 | 2      | 1.06             |
| <sup>213</sup> DLRQGLLPVLE <sup>223</sup>                                           | 626.86 | 2      | -0.33            |
| <sup>79</sup> TEGLRQE <sup>85</sup>                                                 | 416.72 | 2      | -1               |

LC MS/MS analysis of GluC peptide digests generated from apoA-I isolated from human atherosclerotic aorta preparations yielded coverage of  $\geq 90\%$  of apoA-I protein sequence. Peptide sequence, m/z,  $\Delta m$  and charge are listed in the table above.

Carbamylated lysine residue is shown in red

m/z = the ratio of the mass (Da) and the charge (a.u.) of the digested peptide

$\Delta m$  = mass difference (ppm) between measured peptide and its theoretical mass

Charge (positive ion mode) = peptide charge (a.u.)

**Table S10. Xcorr Sequest scores for human atherosclerotic lesion apoA-I peptides containing carbamylated lysine residues detected during proteomic analyses.**

| Peptide Sequence                                          | Human subject aorta carbamylated apoA-I peptide Xcorr Values (n=10) |      |      |      |      |      |      |      |      |      |
|-----------------------------------------------------------|---------------------------------------------------------------------|------|------|------|------|------|------|------|------|------|
|                                                           | 1                                                                   | 2    | 3    | 4    | 5    | 6    | 7    | 8    | 9    | 10   |
| DEPPQSPWDRV <b>K</b> <sub>12</sub> D                      | 2.16                                                                | 2.38 | 2.26 | 2.33 | 2.65 | 2.26 | 2.38 | 2.32 | 2.93 | 2.11 |
| LATVYVDVL <b>K</b> <sub>23</sub> D                        | -                                                                   | -    | -    | -    | -    | 2.39 | -    | -    | -    | -    |
| VL <b>K</b> <sub>23</sub> DSGRDYVSQFE                     | -                                                                   | 2.46 | -    | -    | 3.18 | 2.01 | -    | 2.26 | 2.25 | 2.63 |
| VYVDVL <b>K</b> <sub>23</sub> DSGRDYVSQFE                 | -                                                                   | -    | 2.46 | -    | -    | -    | -    | -    | -    | -    |
| LATVYVDVL <b>K</b> <sub>23</sub> DSGRDYVSQFE              | 3.71                                                                | 3.31 | -    | 3.31 | 3.72 | 4.04 | 3.57 | 3.65 | 3.4  | 3.73 |
| GSALG <b>K</b> <sub>40</sub> QLN                          | 2.71                                                                | 2.15 | -    | 2.61 | 2.74 | 2.27 | 2.64 | 2.72 | 2.9  | -    |
| GSALG <b>K</b> <sub>40</sub> QLNLK                        | -                                                                   | 2.62 | -    | -    | -    | -    | -    | -    | -    | -    |
| ALG <b>K</b> <sub>40</sub> QLNLKLLDNWDSVTS<br>TFSKLR      | 4.41                                                                | -    | -    | -    | -    | 3.54 | 4.29 | -    | 4.88 | 5.02 |
| SALG <b>K</b> <sub>40</sub> QLNLKLLDNWDSVT<br>STFSKLR     | 4.22                                                                | -    | 4.8  | -    | 4.98 | -    | -    | -    | -    | -    |
| GSALG <b>K</b> <sub>40</sub> QLNLKLLD                     | 2.85                                                                | 3.11 | -    | -    | -    | 2.64 | 2.69 | 2.03 | 2.56 | -    |
| GSALGKQLNL <b>K</b> <sub>45</sub> LLDNWDSV<br>TS          | -                                                                   | -    | -    | -    | -    | -    | 2.85 | -    | 3.26 | 3.31 |
| LNL <b>K</b> <sub>45</sub> LLDNWDSVTSTFSKLR               | -                                                                   | 3.52 | -    | -    | -    | -    | -    | -    | -    | -    |
| QFEGSALGKQLNL <b>K</b> <sub>45</sub> LLDNW<br>DSVTSTFSKLR | -                                                                   | -    | -    | -    | -    | -    | 3    | -    | -    | -    |
| WDSVTSTFS <b>K</b> <sub>59</sub> LRE                      | 2.16                                                                | -    | 3.05 | 2.78 | 2.79 | 3.58 | 2.97 | -    | -    | -    |
| NWDSVTSTFS <b>K</b> <sub>59</sub> LRE                     | 4.27                                                                | 3.48 | 3.61 | 4.38 | 4.59 | 3.56 | 4.39 | 3.71 | 3.7  | 3.94 |
| LKLLDNWDSVTSTFS <b>K</b> <sub>59</sub> LRE                | 4.16                                                                | 4.32 | 4.91 | 4.3  | 4.29 | 3.76 | 3.86 | 4.21 | 4.07 | 4.11 |
| NLKLLDNWDSVTSTFS <b>K</b> <sub>59</sub> LR<br>E           | -                                                                   | 3.19 | -    | -    | -    | -    | -    | 2.93 | -    | -    |
| GSALGKQLNLKLLDNWDSVT<br>STFS <b>K</b> <sub>59</sub> L     | -                                                                   | 3.2  | -    | -    | -    | -    | -    | -    | -    | -    |
| FWDNLE <b>K</b> <sub>77</sub> ETE                         | -                                                                   | -    | -    | 2.54 | 2.18 | 2.13 | 2.44 | -    | -    | 2.4  |
| GLRQEM <b>S</b> <sub>88</sub> DLEE                        | -                                                                   | 2.5  | -    | 2.61 | 2.29 | -    | 2.59 | 2.57 | 2.63 | -    |
| TEGLRQEM <b>S</b> <sub>88</sub> DLEE                      | -                                                                   | -    | -    | -    | -    | 2.81 | -    | 2.23 | 3.1  | 3.05 |
| V <b>K</b> <sub>94</sub> AKVQPYLD                         | -                                                                   | -    | -    | -    | -    | 2.13 | -    | -    | -    | -    |
| V <b>K</b> <sub>94</sub> AKVQPYLDD                        | -                                                                   | -    | 2.44 | 2.33 | 2.13 | -    | 2.11 | -    | -    | 2.41 |
| V <b>K</b> <sub>96</sub> VQPYLD                           | -                                                                   | -    | -    | 2.44 | -    | -    | -    | -    | -    | -    |
| FQ <b>K</b> <sub>107</sub> WQEE                           | -                                                                   | -    | 2.05 | -    | -    | -    | -    | -    | -    | -    |
| YR <b>Q</b> <sub>118</sub> VEPLRAE                        | -                                                                   | 2.69 | -    | -    | 2.63 | -    | -    | -    | -    | -    |
| LYR <b>Q</b> <sub>118</sub> VEPLRAE                       | 2.98                                                                | -    | 2.69 | 3.54 | 2.93 | 2.84 | 3.38 | 2.68 | 3.06 | 2.72 |
| MELYR <b>Q</b> <sub>118</sub> VEPLRAE                     | -                                                                   | -    | 2.89 | 3.22 | 3.7  | 3.12 | -    | -    | 2.78 | 2.5  |
| MELYR <b>Q</b> <sub>118</sub> VEPLRAELQE                  | -                                                                   | -    | -    | -    | -    | 2.52 | -    | -    | -    | -    |
| L <b>Q</b> E <b>K</b> <sub>140</sub> LSPLGEE              | -                                                                   | -    | -    | -    | -    | -    | -    | -    | 2.33 | -    |

| Peptide Sequence (Table S10 Continued)                                                                             | 1    | 2    | 3    | 4    | 5    | 6    | 7    | 8    | 9    | 10   |
|--------------------------------------------------------------------------------------------------------------------|------|------|------|------|------|------|------|------|------|------|
| <b>K</b> <sub>140</sub> LSPLGEEMRD                                                                                 | 2.12 | -    | -    | -    | -    | 2.49 | 2.22 | -    | 2.01 | -    |
| AL <b>K</b> <sub>182</sub> ENGGARLAE                                                                               | 1.9  | 2.3  | 2.1  |      | 2.5  | 2.7  | 1.2  |      |      | 2.7  |
| <b>KAK</b> <sub>208</sub> PALE                                                                                     | 2.2  | 2.1  | -    | -    | -    | -    | 2    | -    | 2.05 | -    |
| <b>SFK</b> <sub>226</sub> VSFL                                                                                     | -    | 2.2  | 2.13 | -    | -    | -    | -    | -    | -    | -    |
| <b>SFK</b> <sub>226</sub> VSFLSA                                                                                   | -    | -    | 2.48 | -    | -    | -    | -    | -    | -    | -    |
| <b>SFK</b> <sub>226</sub> VSFLSAL                                                                                  | -    | 2.16 | -    | -    | -    | -    | -    | -    | -    | -    |
| <b>K</b> <sub>226</sub> VSFLSALEE                                                                                  | -    | -    | -    | -    | -    | -    | -    | -    | -    | 2.15 |
| <b>SFK</b> <sub>226</sub> VSFLSALE                                                                                 | -    | 2.66 | 2.36 | -    | -    | 2.61 | 2.8  | -    | -    | -    |
| <b>FK</b> <sub>226</sub> VSFLSALEE                                                                                 | -    | -    | -    | -    | -    | -    | 2.09 | -    | -    | -    |
| <b>SFK</b> <sub>226</sub> VSFLSALEE                                                                                | 4.58 | 3.9  | 4.1  | 4.33 | 4.51 | 4.51 | 3.85 | 3.49 | 3.87 | 3.52 |
| YTK <b>K</b> <sub>239</sub> LNT                                                                                    | 2.04 | -    | -    | -    | -    | -    | -    | -    | -    | -    |
| YTK <b>K</b> <sub>239</sub> LNTQ                                                                                   | -    | 2.6  | 2.22 | 2.48 | 2.46 | 2.45 | 2.46 | 2.44 | 2.61 | 2.31 |
| <b>K</b> <sub>40</sub> QLNL <b>K</b> <sub>45</sub> LLDNWDSVTSTF<br>SKLRE                                           | 5.68 | 4.4  | 4.89 | -    | 5.84 | 4.65 | -    | -    | -    | 3.32 |
| SALG <b>K</b> <sub>40</sub> QLNL <b>K</b> <sub>45</sub> LLDNWDSV<br>TSTFSKLRE                                      | -    | -    | -    | -    | -    | 3.72 | 3.92 | -    | -    | -    |
| GSALG <b>K</b> <sub>40</sub> QLNL <b>K</b> <sub>45</sub> LLDNWDS<br>VTSTF                                          | -    | -    | -    | -    | 2.99 | -    | -    | -    | -    | -    |
| GSALG <b>K</b> <sub>40</sub> QLNL <b>K</b> <sub>45</sub> LLDNWDS<br>VTSTF <b>K</b> <sub>59</sub> LRE               | 5.85 | 5.91 | 6.11 | 5.26 | -    | 5.04 | -    | 5.64 | 5.74 | 5.42 |
| <b>VK</b> <sub>94</sub> <b>AK</b> <sub>96</sub> VQPYLDDFQ <b>K</b> <sub>106</sub> <b>K</b> <sub>107</sub><br>WQEE  | 4.39 | 4.74 | 3.51 | -    | 4.08 | -    | 3.91 | 4.42 | -    | 4.09 |
| <b>EVK</b> <sub>94</sub> <b>AK</b> <sub>96</sub> VQPYLDDFQ<br><b>K</b> <sub>106</sub> <b>K</b> <sub>107</sub> WQEE | -    | -    | 3.85 | 2.75 | 2.65 | 2.84 | 3.33 | -    | 2.69 | -    |
| Reference peptide candidates                                                                                       |      |      |      |      |      |      |      |      |      |      |
| <sup>213</sup> DLRQGLLPVLE <sup>223</sup>                                                                          | 2.55 | 2.48 | 2.75 | 2.53 | 2.45 | 2.66 | 2.49 | 2.43 | 2.59 | 2.44 |
| <sup>79</sup> TEGLRQE <sup>85</sup>                                                                                | 2.18 | 2.05 | 2.50 | 2.10 | 2.23 | 2.08 | 2.27 | 2.15 | 2.02 | 2.39 |
| <sup>63</sup> QLGPVTQE <sup>70</sup>                                                                               | 2.25 | 2.30 | 2.48 | 2.36 | 2.22 | 2.46 | 2.27 | 2.66 | 2.47 | 2.62 |

LC MS/MS analysis of GluC digests generated from apoA-I isolated from human atherosclerotic lesions yielded identification of ≥ 90% of the protein sequence. Peptide sequence and the distribution of Xcorr values produced by Proteome Discoverer are listed above.

Carbamylated lysine residue is shown in red

Xcorr (Proteome Discoverer) = cross-correlation value from the search.

(-)= Not detected.

**Table S11. Kinetic and binding affinity data for lipid poor apoA-I binding to MPO determined by Surface Plasmon Resonance spectroscopy.**

| $k_{on}$ (1/Ms)    | $k_{off}$ (1/s)       | $K_d$ (M)             |
|--------------------|-----------------------|-----------------------|
| $5.02 \times 10^4$ | $3.77 \times 10^{-3}$ | $7.51 \times 10^{-8}$ |

To determine whether MPO specifically interacts with lipid-poor apoA-I we performed Surface Plasmon Resonance (SPR) spectroscopy measurements under physiological salt and pH conditions. MPO was immobilized on a CM5 sensor chip. Samples of apoA-I concentrations ranging from 0.5 nM to ~3000 nM were prepared in binding buffer (10 mM PBS, pH 7.4) and flowed over the sensor chip at a flow rate of 20  $\mu$ L/min. The association rate constant ( $k_{on}$ ), dissociation rate constant ( $k_{off}$ ), and apparent dissociation constant ( $K_d$ ) calculated from the kinetic/binding data are listed above. The results indicate that apoA-I binds tightly to MPO with  $K_d$  in the nanomolar range.

$k_{on}$  is the kinetic rate constant for apoA-I/MPO binding.

$k_{off}$  is the kinetic rate constant for apoA-I/MPO dissociation.

$K_d$  is the dissociation constant of the complex MPO/apoA-I.



**Table S12 .PRIDE accessible raw file names for in-vitro modified apoA-I and apoA-I isolated from human lesion samples used in the proteomics analysis. Files can be accessed using the data set identifier PXD027881.**

**Table S12A. ApoA-I samples used in the proteomics analysis shown in Fig. 3 and Fig. 4**

|    | Sample Name | Sample Description                                | File Name    |
|----|-------------|---------------------------------------------------|--------------|
| 1  | HDL_MPO     | <i>in vitro</i> Modified rHDL by MPO system       | HDL_MPO.raw  |
| 2  | HDL_MPO2    | <i>in vitro</i> Modified rHDL by MPO system       | HDL_MPO2.raw |
| 3  | HDL_MPO3    | <i>in vitro</i> Modified rHDL by MPO system       | HDL_MPO3.raw |
| 4  | HDL_OCN     | <i>in vitro</i> Modified rHDL by CNO- system      | HDL_OCN.raw  |
| 5  | HDL_OCN2    | <i>in vitro</i> Modified rHDL by CNO- system      | HDL_OCN2.raw |
| 6  | HDL_OCN3    | <i>in vitro</i> Modified rHDL by CNO- system      | HDL_OCN3.raw |
| 7  | LP_MPO      | <i>in vitro</i> Modified LP apoA-I by MPO system  | LP_MPO.raw   |
| 8  | LP_MPO2     | <i>in vitro</i> Modified LP apoA-I by MPO system  | LP_MPO2.raw  |
| 9  | LP_MPO3     | <i>in vitro</i> Modified LP apoA-I by MPO system  | LP_MPO3.raw  |
| 10 | LP_OCN      | <i>in vitro</i> Modified LP apoA-I by CNO- system | LP_OCN.raw   |
| 11 | LP_OCN2     | <i>in vitro</i> Modified LP apoA-I by CNO- system | LP_OCN2.raw  |
| 12 | LP_OCN3     | <i>in vitro</i> Modified LP apoA-I by CNO- system | LP_OCN3.raw  |

**Table S12B. ApoA-I samples used in the in solution proteomic analysis shown in Fig. 5**

|    | Sample Name   | Sample Description                    | File Name         |
|----|---------------|---------------------------------------|-------------------|
| 1  | Lum_19may2101 | apoA-I isolated from human subject 1  | Lum_19may2101.raw |
| 2  | Lum_19may2102 | apoA-I isolated from human subject 2  | Lum_19may2102.raw |
| 3  | Lum_19may2103 | apoA-I isolated from human subject 3  | Lum_19may2103.raw |
| 4  | Lum_19may2104 | apoA-I isolated from human subject 4  | Lum_19may2104.raw |
| 5  | Lum_19may2105 | apoA-I isolated from human subject 5  | Lum_19may2105.raw |
| 6  | Lum_19may2106 | apoA-I isolated from human subject 6  | Lum_19may2106.raw |
| 7  | Lum_19may2107 | apoA-I isolated from human subject 7  | Lum_19may2107.raw |
| 8  | Lum_19may2108 | apoA-I isolated from human subject 8  | Lum_19may2108.raw |
| 9  | Lum_19may2109 | apoA-I isolated from human subject 9  | Lum_19may2109.raw |
| 10 | Lum_19may2110 | apoA-I isolated from human subject 10 | Lum_19may2110.raw |

**Table S12C. ApoA-I samples used in the in gel proteomic analysis shown in Fig. 6**

|    | Sample Name      | Sample Description                          | File Name            |
|----|------------------|---------------------------------------------|----------------------|
| 1  | Lum_21nov1701    | apoA-I Dimer isolated from human subject 1  | Lum_21nov1701.raw    |
| 2  | Lum_21nov1702    | apoA-I Dimer isolated from human subject 2  | Lum_21nov1702.raw    |
| 3  | Lum_21nov1703    | apoA-I Dimer isolated from human subject 3  | Lum_21nov1703.raw    |
| 4  | Lum_21nov1704    | apoA-I Dimer isolated from human subject 4  | Lum_21nov1704.raw    |
| 5  | Lum_21nov1705    | apoA-I Dimer isolated from human subject 5  | Lum_21nov1705.raw    |
| 6  | Lum_21nov1706    | apoA-I Dimer isolated from human subject 6  | Lum_21nov1706.raw    |
| 7  | Lum_21nov1707    | apoA-I Dimer isolated from human subject 7  | Lum_21nov1707.raw    |
| 8  | Lum_21nov1708    | apoA-I Dimer isolated from human subject 8  | Lum_21nov1708.raw    |
| 9  | Lum_21nov1709    | apoA-I Dimer isolated from human subject 9  | Lum_21nov1709.raw    |
| 10 | Lum_21nov1711-re | apoA-I Dimer isolated from human subject 10 | Lum_21nov1711-re.raw |

|    |               |                                               |                   |
|----|---------------|-----------------------------------------------|-------------------|
| 11 | Lum_21nov1713 | apoA-I Monomer isolated from human subject 1  | Lum_21nov1713.raw |
| 12 | Lum_21nov1714 | apoA-I Monomer isolated from human subject 2  | Lum_21nov1714.raw |
| 13 | Lum_21nov1715 | apoA-I Monomer isolated from human subject 3  | Lum_21nov1715.raw |
| 14 | Lum_21nov1716 | apoA-I Monomer isolated from human subject 4  | Lum_21nov1716.raw |
| 15 | Lum_21nov1717 | apoA-I Monomer isolated from human subject 5  | Lum_21nov1717.raw |
| 16 | Lum_21nov1718 | apoA-I Monomer isolated from human subject 6  | Lum_21nov1718.raw |
| 17 | Lum_21nov1719 | apoA-I Monomer isolated from human subject 7  | Lum_21nov1719.raw |
| 18 | Lum_21nov1720 | apoA-I Monomer isolated from human subject 8  | Lum_21nov1720.raw |
| 19 | Lum_21nov1721 | apoA-I Monomer isolated from human subject 9  | Lum_21nov1721.raw |
| 20 | Lum_21nov1722 | apoA-I Monomer isolated from human subject 10 | Lum_21nov1722.raw |

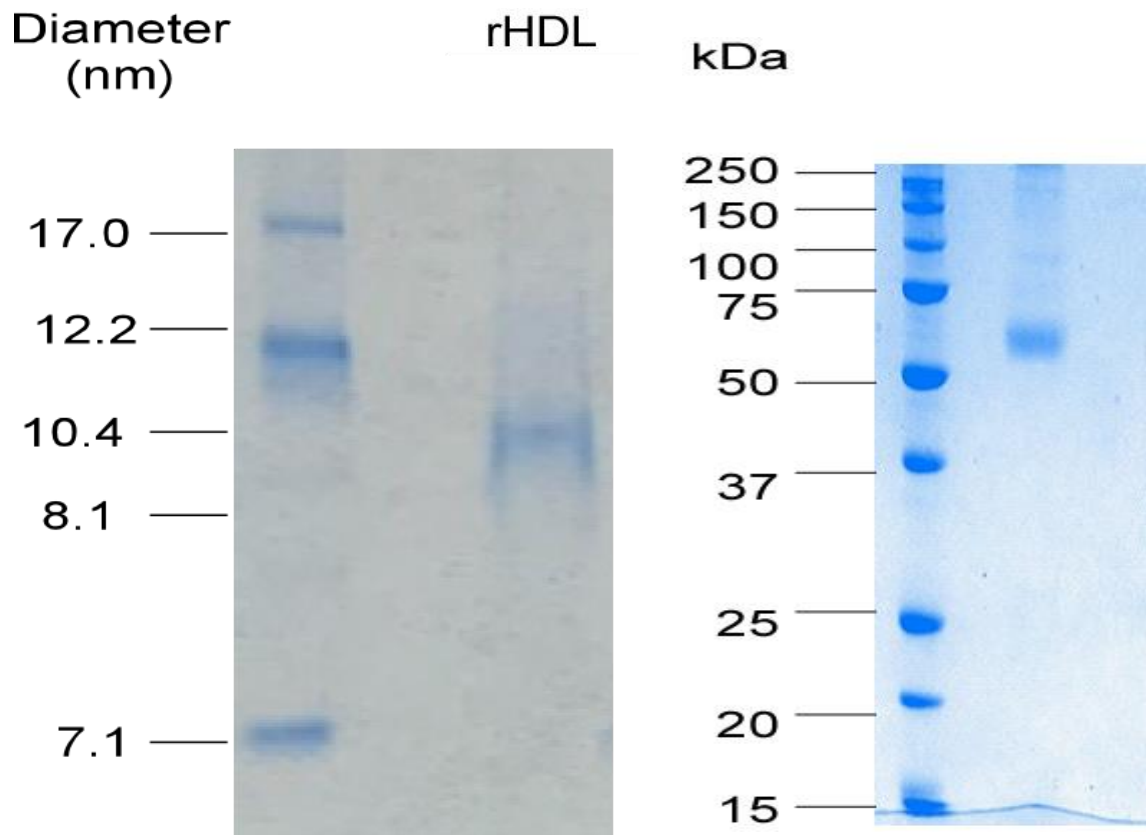

**Figure S1. Characterization of reconstituted HDL particles.** Reconstituted HDL (rHDL) particles were prepared using a modified cholate dialysis method at a molar ratio of 100:10:1, POPC: Cholesterol: apoA-I. Left: native-PAGE gel analysis of rHDL containing purified recombinant human apoA-I. Reconstituted HDL was purified by gel filtration and loaded (10  $\mu$ g of protein) on a 4-20% gradient gel. The rHDL particle has a diameter of approximately 10 nm, consistent with preparations used in previous studies. Right: Purified 96- $\text{\AA}$  diameter POPC/Cholesterol rHDL-containing human apoA-I was cross-linked with BS3 cross-linker for 5 min at 37  $^{\circ}\text{C}$  and then quenched by the addition of Tris, pH 7.4 and samples fractionated on 12% SDS-PAGE gel. Left lane shows molecular mass standards and right lane shows bands for crosslinked rHDL.

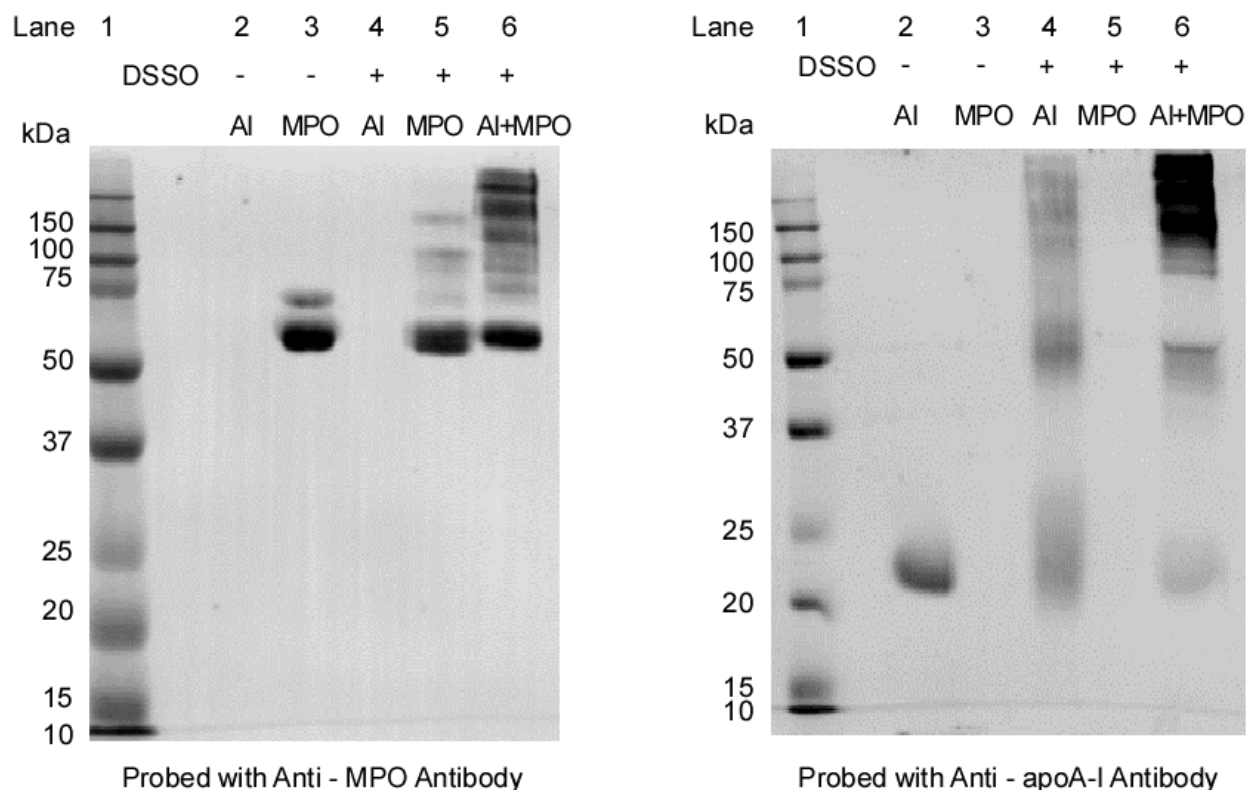

**Figure S2. Western blot analysis of lipid poor apoA-I crosslinked with MPO.** To further confirm the result of the Surface Plasmon Resonance (SPR) spectroscopy experiment, we crosslinked lipid poor apoA-I with MPO using the DSSO crosslinker as described in Experimental Procedures. The indicated samples were fractionated on a 12% reducing SDS-PAGE gel and proteins transferred to PVDF membranes for western blot analysis. A. Western blot analysis using anti-MPO antibody in the presence or absence of DSSO are shown in the gel. Lane 1: Marker, Lane 2: apoA-I only, Lane 3: MPO only, Lane 4: apoA-I+DSSO, Lane 5: MPO+DSSO, and Lane 6: MPO+apoA-I+DSSO. Samples were probed either with anti-MPO antibody or anti-apoA-I antibody (10G) to detect the presence of MPO or apoA-I in the sample, respectively.

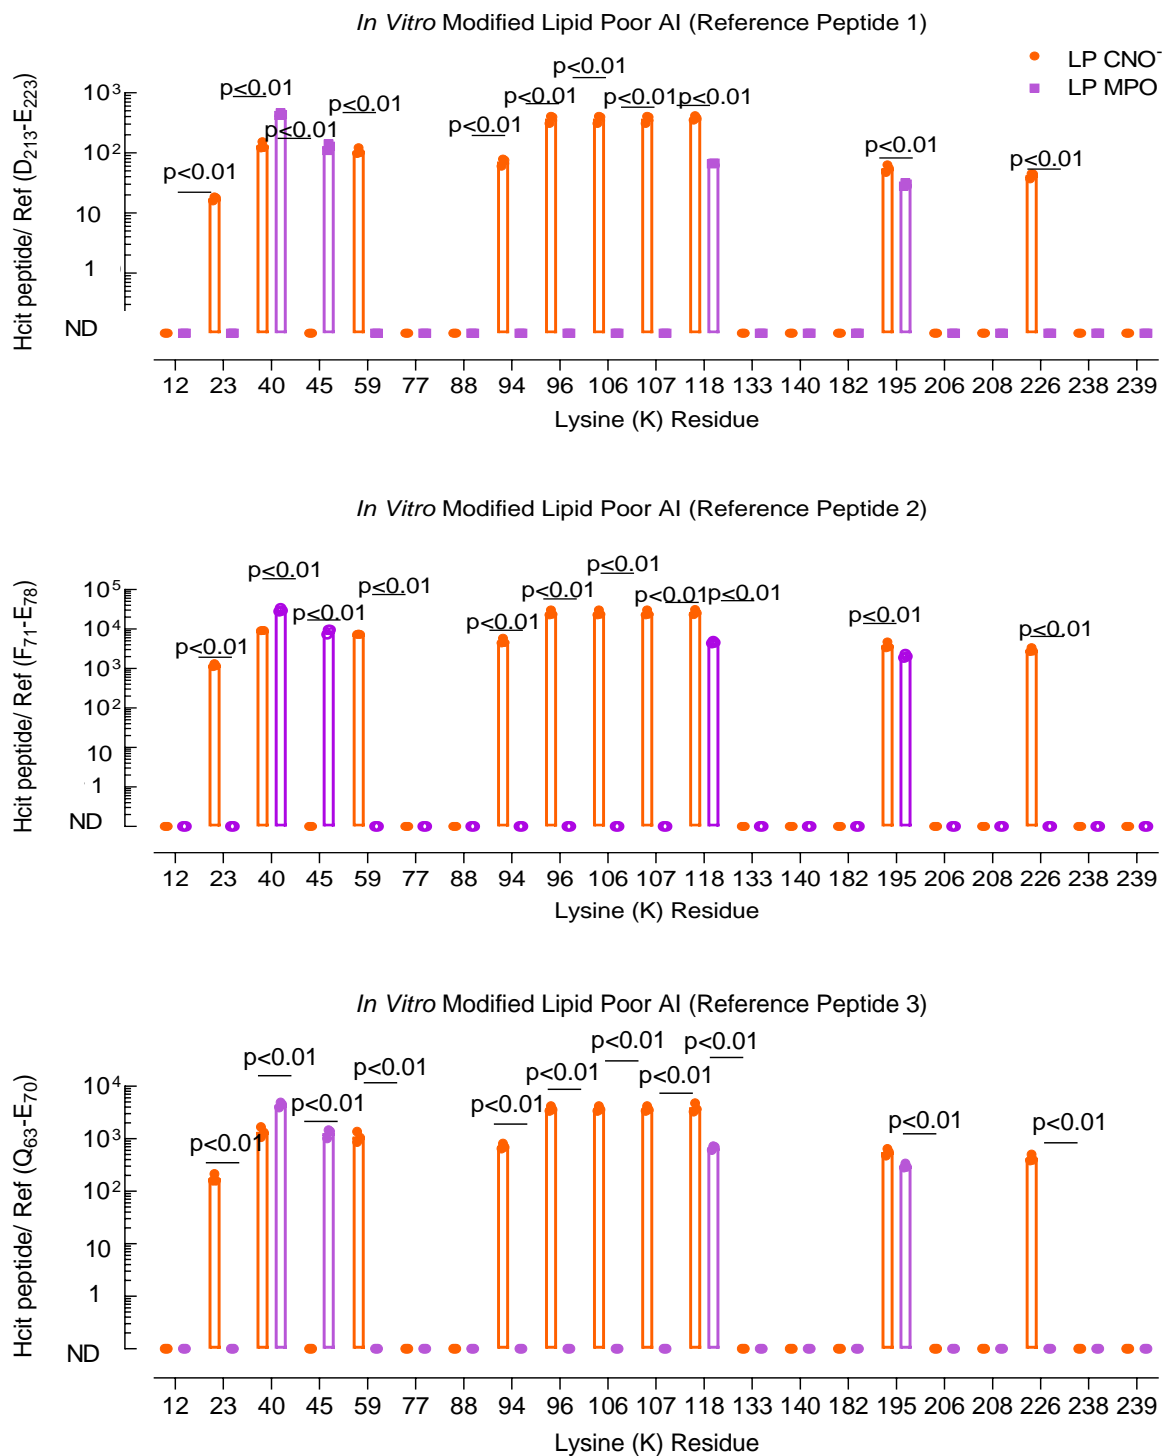

**Figure S3. Quantification of carbamylated lysine residues in lipid poor apoA-I modified *in vitro* by the MPO or CNO<sup>-</sup> system.** The top, middle, and bottom panels show the peak areas of carbamylated lysine containing peptides divided by the peak area average of 3 distinct reference peptide candidates (multiplied by 10<sup>4</sup>). Reference peptide candidates D<sub>213</sub>-E<sub>223</sub>, F<sub>71</sub>-E<sub>78</sub> and Q<sub>63</sub>-E<sub>70</sub> were used for quantitation in this analysis. Note that the overall patterns observed are highly aligned, regardless of which reference peptide was used.

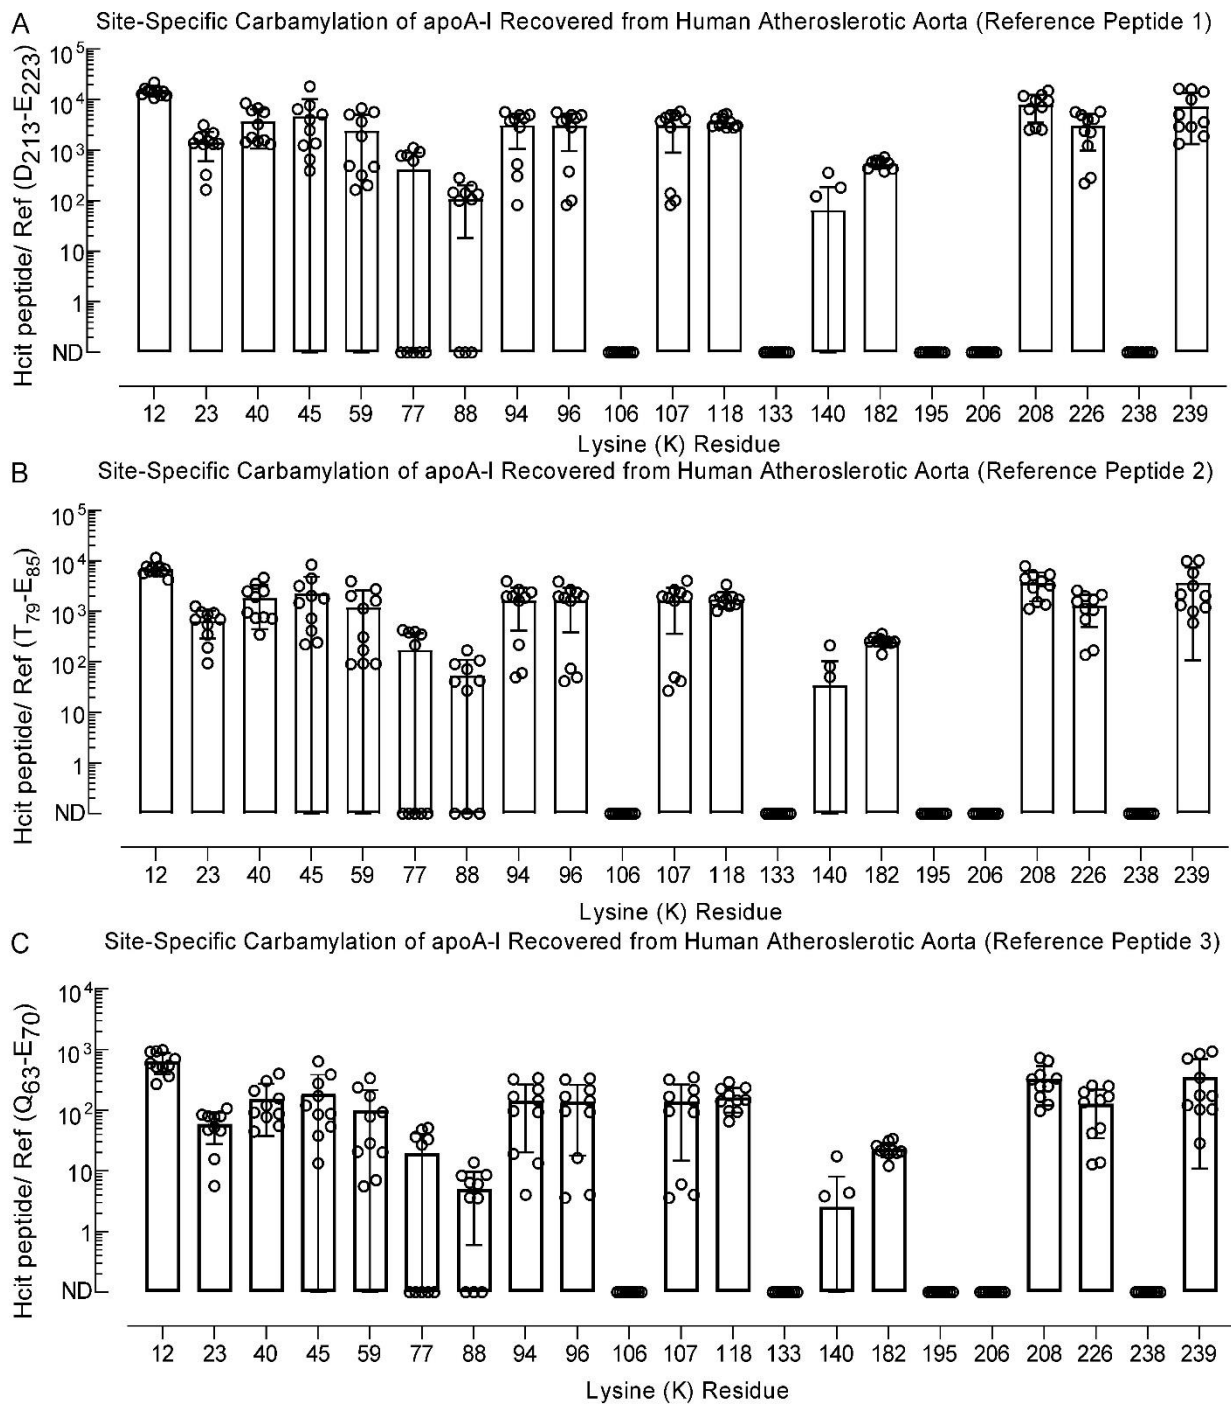

**Figure S4. Quantification of site-specific carbamylation of apoA-I recovered from human atherosclerotic aorta.** A-C. Each panel displays the peak area of peptides containing modified lysine residues divided by the peak area of a distinct reference peptide candidates (multiplied by 10<sup>4</sup>). Reference peptide candidates D<sub>213</sub>-E<sub>223</sub>, T<sub>79</sub>-E<sub>85</sub> and Q<sub>63</sub>-E<sub>70</sub> were used for quantitation in this analysis. Note that the overall patterns observed are highly aligned, regardless of which reference peptide was used.

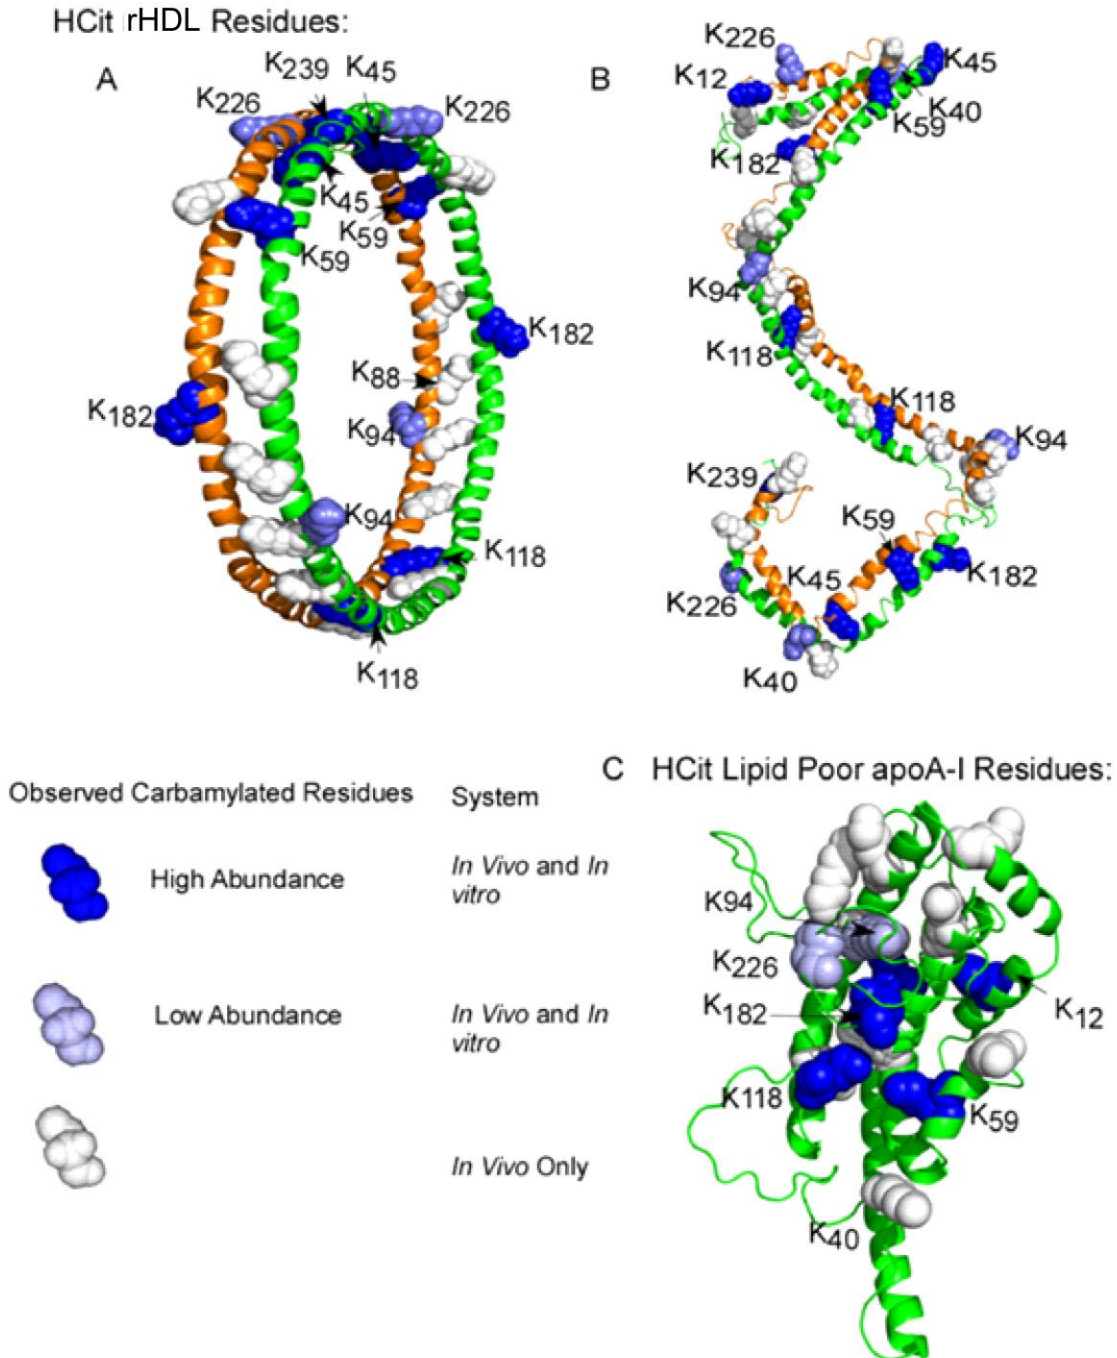

**Figure S5. Lysine carbamylation sites identified by the proteomic analysis of rHDL and lipid poor apoA-I modified *in vitro* by CNO<sup>-</sup>.** A) Lysine residues carbamylated by the CNO<sup>-</sup> system in rHDL are mapped onto the Double Belt model of rHDL. B) Lysine residues carbamylated by the CNO<sup>-</sup> system in rHDL are mapped onto the Double Super Helix model of rHDL. C) Lysine residues carbamylated by the CNO<sup>-</sup> system in lipid poor apoA-I are mapped onto a model of lipid poor apoA-I. Dark blue spheres depict lysine residues that were carbamylated to the greatest extent, while the light blue spheres depict lysine residues that are carbamylated to a lesser extent in the *in vitro* model systems. White spheres are additional sites that were observed to be carbamylated in apoA-I recovered from human atherosclerotic aorta.

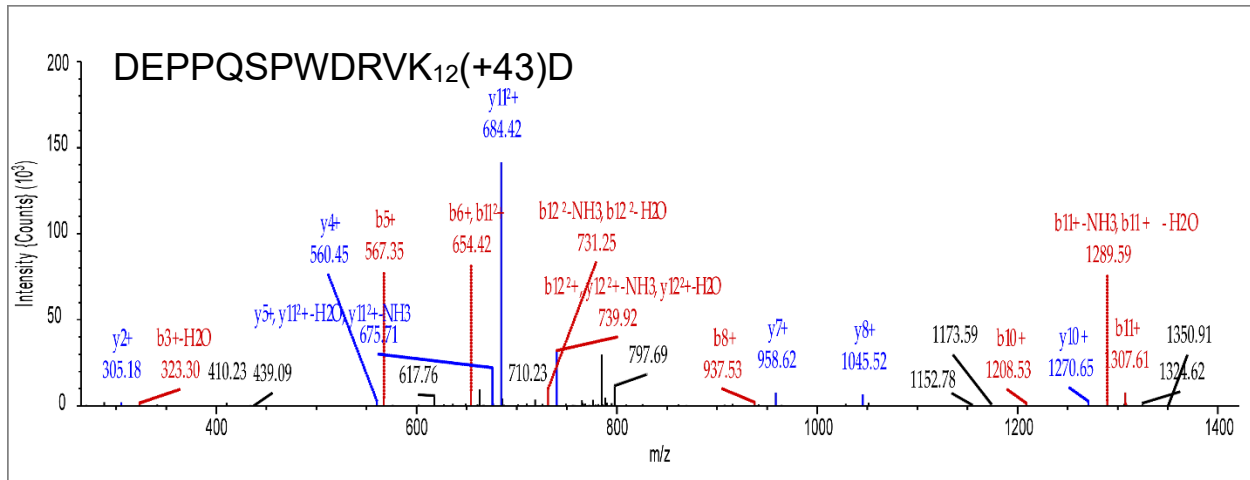

| #1 | b <sup>+</sup> | b <sup>2+</sup> | Seq.       | y <sup>+</sup> | y <sup>2+</sup> | #2 |
|----|----------------|-----------------|------------|----------------|-----------------|----|
| 1  | 116.03422      | 58.52075        | D          |                |                 | 13 |
| 2  | 245.07681      | 123.04204       | E          | 1496.71283     | 748.86005       | 12 |
| 3  | 342.12958      | 171.56843       | P          | 1367.67024     | 684.33876       | 11 |
| 4  | 439.18234      | 220.09481       | P          | 1270.61748     | 635.81238       | 10 |
| 5  | 567.24092      | 284.12410       | Q          | 1173.56471     | 587.28599       | 9  |
| 6  | 654.27295      | 327.64011       | S          | 1045.50613     | 523.25671       | 8  |
| 7  | 751.32571      | 376.16649       | P          | 958.47411      | 479.74069       | 7  |
| 8  | 937.40502      | 469.20615       | W          | 861.42134      | 431.21431       | 6  |
| 9  | 1052.43197     | 526.71962       | D          | 675.34203      | 338.17465       | 5  |
| 10 | 1208.53308     | 604.77018       | R          | 560.31509      | 280.66118       | 4  |
| 11 | 1307.60149     | 654.30438       | V          | 404.21398      | 202.61063       | 3  |
| 12 | 1478.70227     | 739.85477       | K-Carbamyl | 305.14556      | 153.07642       | 2  |
| 13 |                |                 | D          | 134.04478      | 67.52603        | 1  |

| Sample:                       | Observed in: |
|-------------------------------|--------------|
| Human plaque                  | yes          |
| <i>In-Vitro</i> rHDL OCN      | ND           |
| <i>In-Vitro</i> rHDL MPO      | ND           |
| <i>In-Vitro</i> LP apoA-I OCN | ND           |
| <i>In-Vitro</i> LP apoA-I MPO | ND           |

**Figure S6: Annotated MS/MS spectrum and table of fragmentation ions for carbamylated apoA-I peptide DEPPQSPWDRVK<sub>12</sub>(carbamyl)D.** Human apoA-I was either recovered via immunoprecipitation from homogenized human atherosclerotic aorta (Human plaque), or recombinant human apoA-I (lipid poor (LP) vs. within rHDL) was exposed to the indicated *in vitro* carbamylation systems. ApoA-I was then subjected to proteolysis and proteomics analyses as described under Experimental Procedures. Top - CID spectrum for the indicated apoA-I peptide sequence harboring a carbamyllysine residue. Middle – Fragmentation table of peptide ions. Bottom – Table stating whether the carbamyllysine (K+43)-harboring apoA-I peptide was observed either in apoA-I recovered from human plaque or within the indicated *in vitro* carbamylated apoA-I samples. ND, not detected.



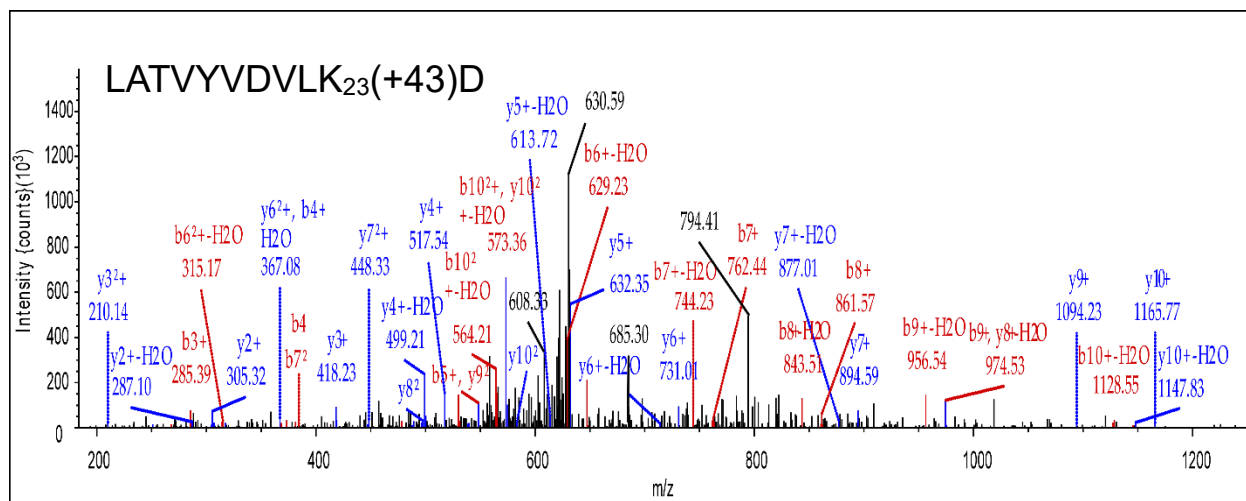

| #1 | b <sup>+</sup> | b <sup>2+</sup> | Seq.       | y <sup>+</sup> | y <sup>2+</sup> | #2 |
|----|----------------|-----------------|------------|----------------|-----------------|----|
| 1  | 114.09134      | 57.54931        | L          |                |                 | 11 |
| 2  | 185.12845      | 93.06787        | A          | 1165.60993     | 583.30860       | 10 |
| 3  | 286.17613      | 143.59170       | T          | 1094.57282     | 547.79005       | 9  |
| 4  | 385.24455      | 193.12591       | V          | 993.52514      | 497.26621       | 8  |
| 5  | 548.30788      | 274.65758       | Y          | 894.45672      | 447.73200       | 7  |
| 6  | 647.37629      | 324.19178       | V          | 731.39340      | 366.20034       | 6  |
| 7  | 762.40323      | 381.70525       | D          | 632.32498      | 316.66613       | 5  |
| 8  | 861.47165      | 431.23946       | V          | 517.29804      | 259.15266       | 4  |
| 9  | 974.55571      | 487.78149       | L          | 418.22963      | 209.61845       | 3  |
| 10 | 1145.65649     | 573.33188       | K-Carbamyl | 305.14556      | 153.07642       | 2  |
| 11 |                |                 | D          | 134.04478      | 67.52603        | 1  |

| Sample:                       | Observed in: |
|-------------------------------|--------------|
| Human plaque                  | yes          |
| <i>In-Vitro</i> rHDL OCN      | ND           |
| <i>In-Vitro</i> rHDL MPO      | yes          |
| <i>In-Vitro</i> LP apoA-I OCN | yes          |
| <i>In-Vitro</i> LP apoA-I MPO | ND           |

**Figure S7: Annotated MS/MS spectrum and table of fragmentation ions for carbamylated apoA-I peptide LATVYVDVLK<sub>23</sub>(carbamyl)D.** Human apoA-I was either recovered via immunoprecipitation from homogenized human atherosclerotic aorta (Human plaque), or recombinant human apoA-I (lipid poor (LP) vs within rHDL) was exposed to the indicated *in vitro* carbamylation systems. ApoA-I was then subjected to proteolysis and proteomics analyses as described under Experimental Procedures. Top - CID spectrum for the indicated apoA-I peptide sequence harboring a carbamyllysine residue. Middle – Fragmentation table of peptide ions. Bottom – Table stating whether the carbamyllysine (K+43)-harboring apoA-I peptide was observed either in apoA-I recovered from human plaque or within the indicated *in vitro* carbamylated apoA-I samples. ND, not detected.

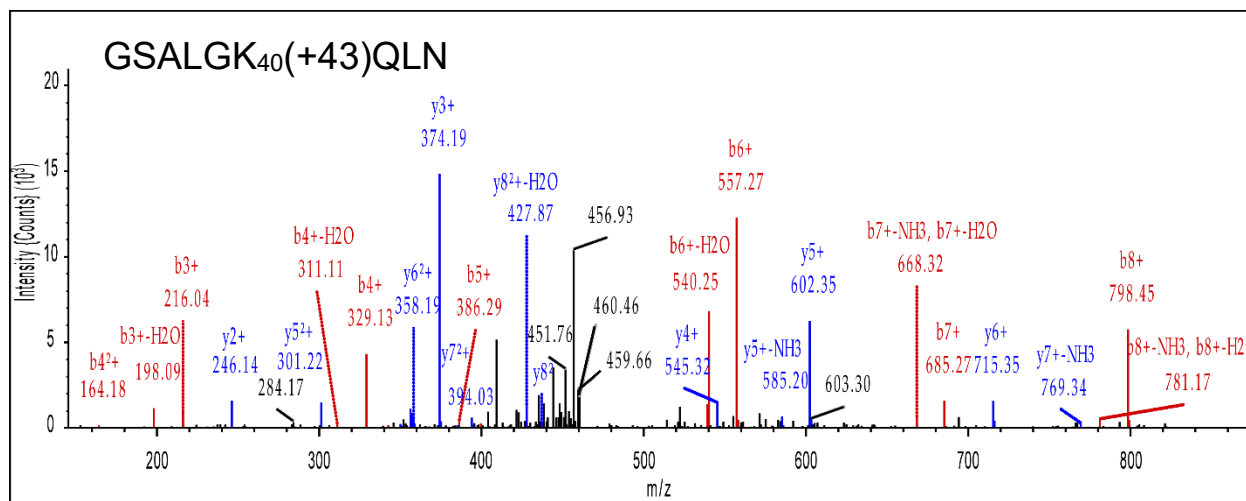

| #1 | b <sup>+</sup> | b <sup>2+</sup> | Seq.       | y <sup>+</sup> | y <sup>2+</sup> | #2 |
|----|----------------|-----------------|------------|----------------|-----------------|----|
| 1  | 58.02874       | 29.51801        | G          |                |                 | 9  |
| 2  | 145.06077      | 73.03402        | S          | 873.47886      | 437.24307       | 8  |
| 3  | 216.09788      | 108.55258       | A          | 786.44683      | 393.72705       | 7  |
| 4  | 329.18195      | 165.09461       | L          | 715.40971      | 358.20850       | 6  |
| 5  | 386.20341      | 193.60534       | G          | 602.32565      | 301.66646       | 5  |
| 6  | 557.30419      | 279.15573       | K-Carbamyl | 545.30419      | 273.15573       | 4  |
| 7  | 685.36276      | 343.18502       | Q          | 374.20341      | 187.60534       | 3  |
| 8  | 798.44683      | 399.72705       | L          | 246.14483      | 123.57605       | 2  |
| 9  |                |                 | N          | 133.06077      | 67.03402        | 1  |

| Sample:                       | Observed in: |
|-------------------------------|--------------|
| Human plaque                  | yes          |
| <i>In-Vitro</i> rHDL OCN      | yes          |
| <i>In-Vitro</i> rHDL MPO      | yes          |
| <i>In-Vitro</i> LP apoA-I OCN | yes          |
| <i>In-Vitro</i> LP apoA-I MPO | yes          |

**Figure S8: Annotated MS/MS spectrum and table of fragmentation ions for carbamylated apoA-I peptide GSALGK<sub>40</sub>(carbamyl)QLN.** Human apoA-I was either recovered via immunoprecipitation from homogenized human atherosclerotic aorta (Human plaque), or recombinant human apoA-I (lipid poor (LP) vs within rHDL) was exposed to the indicated *in vitro* carbamylation systems. ApoA-I was then subjected to proteolysis and proteomics analyses as described under Experimental Procedures. Top - CID spectrum for the indicated apoA-I peptide sequence harboring a carbamyllysine residue. Middle – Fragmentation table of peptide ions. Bottom – Table stating whether the carbamyllysine (K+43)-harboring apoA-I peptide was observed either in apoA-I recovered from human plaque or within the indicated *in vitro* carbamylated apoA-I samples.

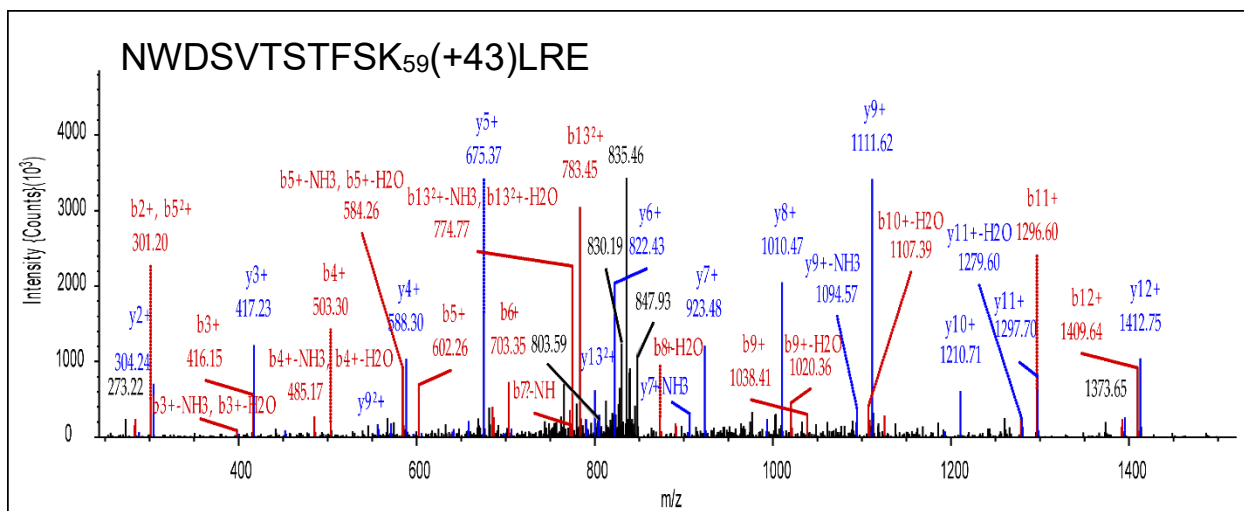

| #1 | b <sup>+</sup> | b <sup>2+</sup> | Seq.             | y <sup>+</sup> | y <sup>2+</sup> | #2 |
|----|----------------|-----------------|------------------|----------------|-----------------|----|
| 1  | 115.05020      | 58.02874        | N                |                |                 | 14 |
| 2  | 301.12952      | 151.06840       | W                | 1598.78091     | 799.89409       | 13 |
| 3  | 416.15646      | 208.58187       | D                | 1412.70160     | 706.85444       | 12 |
| 4  | 503.18849      | 252.09788       | S                | 1297.67466     | 649.34097       | 11 |
| 5  | 602.25690      | 301.63209       | V                | 1210.64263     | 605.82495       | 10 |
| 6  | 703.30458      | 352.15593       | T                | 1111.57421     | 556.29075       | 9  |
| 7  | 790.33661      | 395.67194       | S                | 1010.52654     | 505.76691       | 8  |
| 8  | 891.38429      | 446.19578       | T                | 923.49451      | 462.25089       | 7  |
| 9  | 1038.45270     | 519.72999       | F                | 822.44683      | 411.72705       | 6  |
| 10 | 1125.48473     | 563.24600       | S                | 675.37841      | 338.19285       | 5  |
| 11 | 1296.58551     | 648.79639       | K-<br>Carbamylyl | 588.34639      | 294.67683       | 4  |
| 12 | 1409.66957     | 705.33842       | L                | 417.24561      | 209.12644       | 3  |
| 13 | 1565.77068     | 783.38898       | R                | 304.16155      | 152.58441       | 2  |
| 14 |                |                 | E                | 148.06043      | 74.53386        | 1  |

| Sample:                       | Observed in: |
|-------------------------------|--------------|
| Human plaque                  | yes          |
| <i>In-Vitro</i> rHDL OCN      | yes          |
| <i>In-Vitro</i> rHDL MPO      | ND           |
| <i>In-Vitro</i> LP apoA-I OCN | yes          |
| <i>In-Vitro</i> LP apoA-I MPO | ND           |

**Figure S9: Annotated MS/MS spectrum and table of fragmentation ions for carbamylated apoA-I peptide NWDSVTSTFSK<sub>59</sub>(carbamyl)LRE.** Human apoA-I was either recovered via immunoprecipitation from homogenized human atherosclerotic aorta (Human plaque), or recombinant human apoA-I (lipid poor (LP) vs within rHDL) was exposed to the indicated *in vitro* carbamylation systems. ApoA-I was then subjected to proteolysis and proteomics analyses as described under Experimental Procedures. Top - CID spectrum for the indicated apoA-I peptide sequence harboring a carbamyllysine residue. Middle – Fragmentation table of peptide ions. Bottom – Table stating whether the carbamyllysine (K+43)-harboring apoA-I peptide was observed either in apoA-I recovered from human plaque or within the indicated *in vitro* carbamylated apoA-I samples.

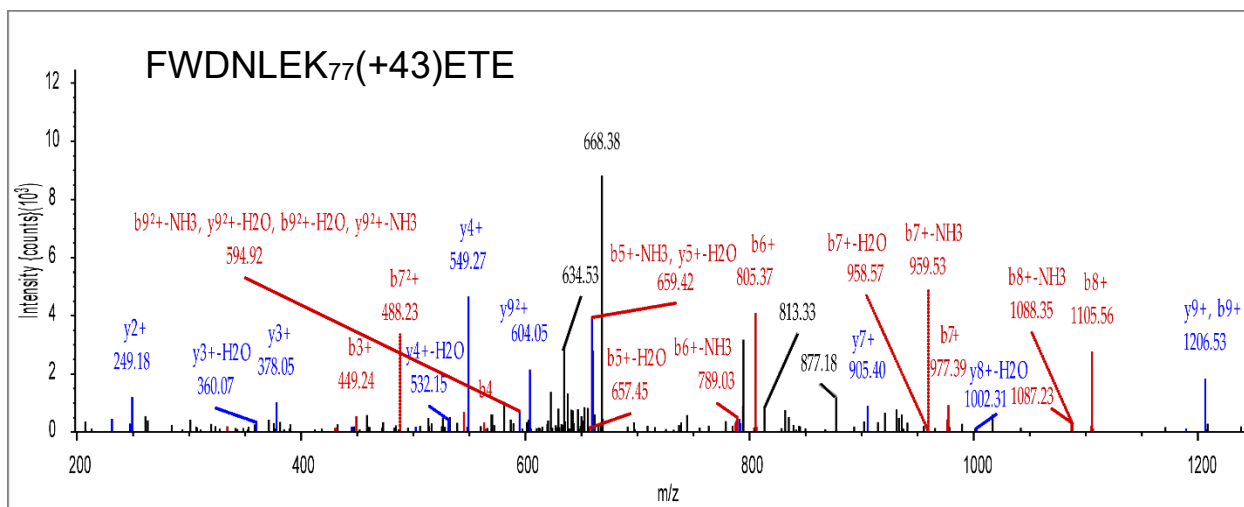

| #1 | b <sup>+</sup> | b <sup>2+</sup> | Seq.       | y <sup>+</sup> | y <sup>2+</sup> | #2 |
|----|----------------|-----------------|------------|----------------|-----------------|----|
| 1  | 148.07569      | 74.54148        | F          |                |                 | 10 |
| 2  | 334.15500      | 167.58114       | W          | 1206.52732     | 603.76730       | 9  |
| 3  | 449.18195      | 225.09461       | D          | 1020.44801     | 510.72764       | 8  |
| 4  | 563.22487      | 282.11608       | N          | 905.42107      | 453.21417       | 7  |
| 5  | 676.30894      | 338.65811       | L          | 791.37814      | 396.19271       | 6  |
| 6  | 805.35153      | 403.17940       | E          | 678.29408      | 339.65068       | 5  |
| 7  | 976.45231      | 488.72979       | K-Carbamyl | 549.25148      | 275.12938       | 4  |
| 8  | 1105.49490     | 553.25109       | E          | 378.15071      | 189.57899       | 3  |
| 9  | 1206.54258     | 603.77493       | T          | 249.10811      | 125.05769       | 2  |
| 10 |                |                 | E          | 148.06043      | 74.53386        | 1  |

| Sample:                       | Observed in: |
|-------------------------------|--------------|
| Human plaque                  | yes          |
| <i>In-Vitro</i> rHDL OCN      | ND           |
| <i>In-Vitro</i> rHDL MPO      | ND           |
| <i>In-Vitro</i> LP apoA-I OCN | ND           |
| <i>In-Vitro</i> LP apoA-I MPO | ND           |

**Figure S10: Annotated MS/MS spectrum and table of fragmentation ions for carbamylated apoA-I peptide FWDNLEK<sub>77</sub>(carbamyl)ETE.** Human apoA-I was either recovered via immunoprecipitation from homogenized human atherosclerotic aorta (Human plaque), or recombinant human apoA-I (lipid poor (LP) vs within rHDL) was exposed to the indicated *in vitro* carbamylation systems. ApoA-I was then subjected to proteolysis and proteomics analyses as described under Experimental Procedures. Top - CID spectrum for the indicated apoA-I peptide sequence harboring a carbamyllysine residue. Middle – Fragmentation table of peptide ions. Bottom – Table stating whether the carbamyllysine (K+43)-harboring apoA-I peptide was observed either in apoA-I recovered from human plaque or within the indicated *in vitro* carbamylated apoA-I samples.

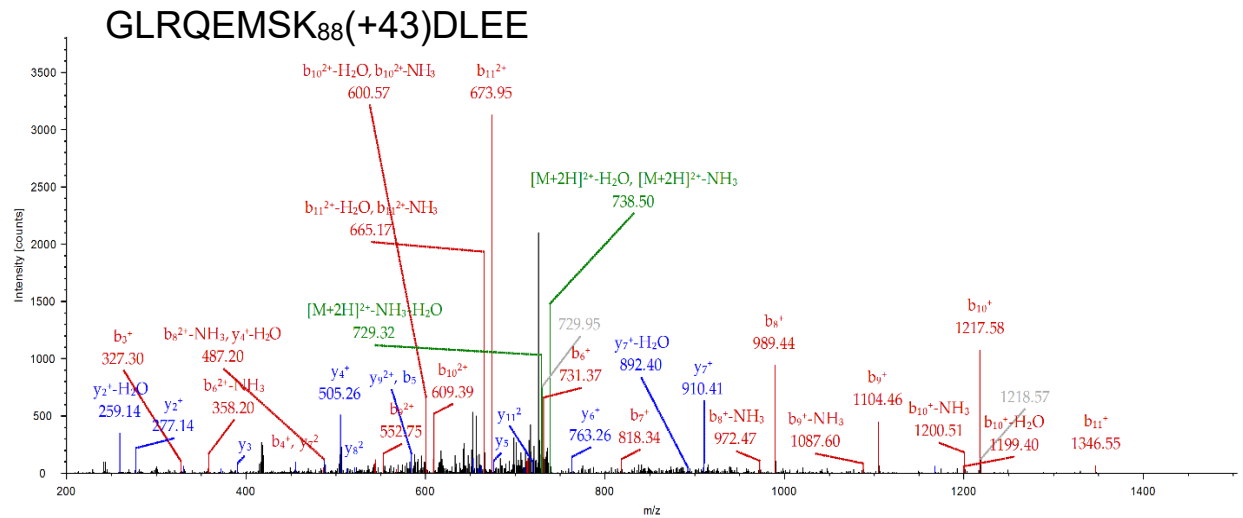

| #1 | b <sup>+</sup> | b <sup>2+</sup> | Seq.        | y <sup>+</sup> | y <sup>2+</sup> | #2 |
|----|----------------|-----------------|-------------|----------------|-----------------|----|
| 1  | 58.02874       | 29.51801        | G           |                |                 | 12 |
| 2  | 171.11280      | 86.06004        | L           | 1436.66858     | 718.83793       | 11 |
| 3  | 327.21392      | 164.11060       | R           | 1323.58452     | 662.29590       | 10 |
| 4  | 455.27249      | 228.13988       | Q           | 1167.48341     | 584.24534       | 9  |
| 5  | 584.31509      | 292.66118       | E           | 1039.42483     | 520.21605       | 8  |
| 6  | 731.35049      | 366.17888       | M-Oxidation | 910.38224      | 455.69476       | 7  |
| 7  | 818.38251      | 409.69490       | S           | 763.34684      | 382.17706       | 6  |
| 8  | 989.48329      | 495.24528       | K-Carbamyl  | 676.31481      | 338.66104       | 5  |
| 9  | 1104.51023     | 552.75876       | D           | 505.21403      | 253.11066       | 4  |
| 10 | 1217.59430     | 609.30079       | L           | 390.18709      | 195.59718       | 3  |
| 11 | 1346.63689     | 673.82208       | E           | 277.10303      | 139.05515       | 2  |
| 12 |                |                 | E           | 148.06043      | 74.53386        | 1  |

| Sample:                       | Observed in: |
|-------------------------------|--------------|
| Human plaque                  | yes          |
| <i>In-Vitro</i> rHDL OCN      | ND           |
| <i>In-Vitro</i> rHDL MPO      | ND           |
| <i>In-Vitro</i> LP apoA-I OCN | ND           |
| <i>In-Vitro</i> LP apoA-I MPO | ND           |

**Figure S11: Annotated MS/MS spectrum and table of fragmentation ions for carbamylated apoA-I peptide GLRQEMSK<sub>88</sub>(carbamyl)DLEE.** Human apoA-I was either recovered via immunoprecipitation from homogenized human atherosclerotic aorta (Human plaque), or recombinant human apoA-I (lipid poor (LP) vs within rHDL) was exposed to the indicated *in vitro* carbamylation systems. ApoA-I was then subjected to proteolysis and proteomics analyses as described under Experimental Procedures. Top - CID spectrum for the indicated apoA-I peptide sequence harboring a carbamyllysine residue. Middle – Fragmentation table of peptide ions. Bottom – Table stating whether the carbamyllysine (K+43)-harboring apoA-I peptide was observed either in apoA-I recovered from human plaque or within the indicated *in vitro* carbamylated apoA-I samples.

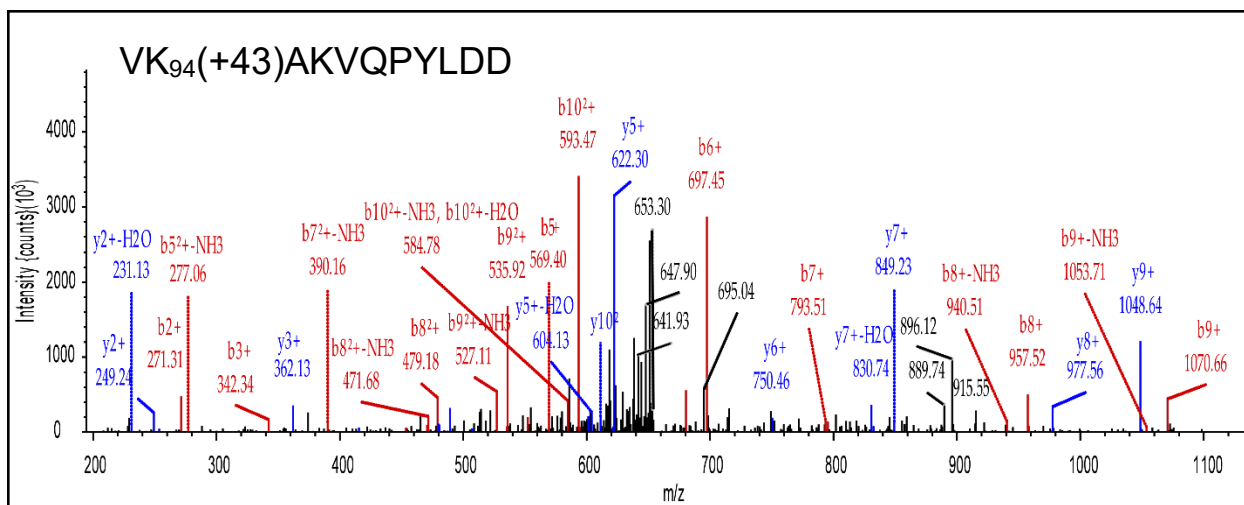

| #1 | b <sup>+</sup> | b <sup>2+</sup> | Seq.       | y <sup>+</sup> | y <sup>2+</sup> | #2 |
|----|----------------|-----------------|------------|----------------|-----------------|----|
| 1  | 100.07569      | 50.54148        | V          |                |                 | 11 |
| 2  | 271.17647      | 136.09187       | K-Carbamyl | 1219.63173     | 610.31950       | 10 |
| 3  | 342.21358      | 171.61043       | A          | 1048.53095     | 524.76911       | 9  |
| 4  | 470.30854      | 235.65791       | K          | 977.49384      | 489.25056       | 8  |
| 5  | 569.37696      | 285.19212       | V          | 849.39887      | 425.20308       | 7  |
| 6  | 697.43554      | 349.22141       | Q          | 750.33046      | 375.66887       | 6  |
| 7  | 794.48830      | 397.74779       | P          | 622.27188      | 311.63958       | 5  |
| 8  | 957.55163      | 479.27945       | Y          | 525.21912      | 263.11320       | 4  |
| 9  | 1070.63569     | 535.82148       | L          | 362.15579      | 181.58153       | 3  |
| 10 | 1185.66263     | 593.33496       | D          | 249.07173      | 125.03950       | 2  |
| 11 |                |                 | D          | 134.04478      | 67.52603        | 1  |

| Sample:                       | Observed in: |
|-------------------------------|--------------|
| Human plaque                  | yes          |
| <i>In-Vitro</i> rHDL OCN      | yes          |
| <i>In-Vitro</i> rHDL MPO      | yes          |
| <i>In-Vitro</i> LP apoA-I OCN | yes          |
| <i>In-Vitro</i> LP apoA-I MPO | ND           |

**Figure S12: Annotated MS/MS spectrum and table of fragmentation ions for carbamylated apoA-I peptide VK<sub>94</sub>(carbamyl)AKVQPYLDD.** Human apoA-I was either recovered via immunoprecipitation from homogenized human atherosclerotic aorta (Human plaque), or recombinant human apoA-I (lipid poor (LP) vs within rHDL) was exposed to the indicated *in vitro* carbamylation systems. ApoA-I was then subjected to proteolysis and proteomics analyses as described under Experimental Procedures. Top - CID spectrum for the indicated apoA-I peptide sequence harboring a carbamyllysine residue. Middle – Fragmentation table of peptide ions. Bottom – Table stating whether the carbamyllysine (K+43)-harboring apoA-I peptide was observed either in apoA-I recovered from human plaque or within the indicated *in vitro* carbamylated apoA-I samples.

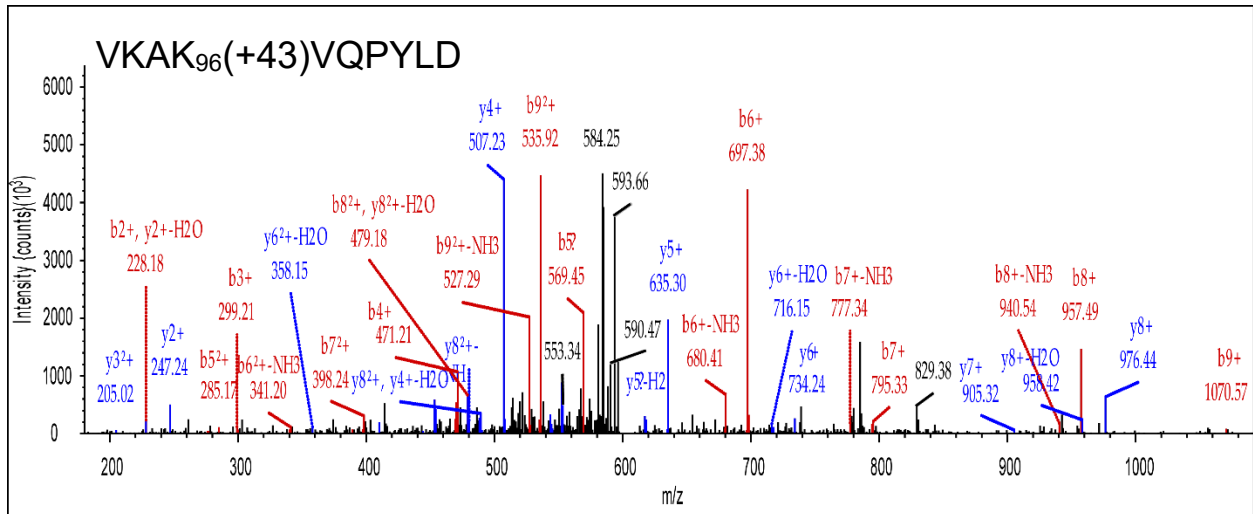

| #1 | b <sup>+</sup> | b <sup>2+</sup> | Seq.       | y <sup>+</sup> | y <sup>2+</sup> | #2 |
|----|----------------|-----------------|------------|----------------|-----------------|----|
| 1  | 100.07569      | 50.54148        | V          |                |                 | 10 |
| 2  | 228.17065      | 114.58897       | K          | 1104.60479     | 552.80603       | 9  |
| 3  | 299.20777      | 150.10752       | A          | 976.50982      | 488.75855       | 8  |
| 4  | 470.30854      | 235.65791       | K-Carbamyl | 905.47271      | 453.23999       | 7  |
| 5  | 569.37696      | 285.19212       | V          | 734.37193      | 367.68960       | 6  |
| 6  | 697.43554      | 349.22141       | Q          | 635.30352      | 318.15540       | 5  |
| 7  | 794.48830      | 397.74779       | P          | 507.24494      | 254.12611       | 4  |
| 8  | 957.55163      | 479.27945       | Y          | 410.19218      | 205.59973       | 3  |
| 9  | 1070.63569     | 535.82148       | L          | 247.12885      | 124.06806       | 2  |
| 10 |                |                 | D          | 134.04478      | 67.52603        | 1  |

| Sample:                       | Observed in: |
|-------------------------------|--------------|
| Human plaque                  | yes          |
| <i>In-Vitro</i> rHDL OCN      | ND           |
| <i>In-Vitro</i> rHDL MPO      | ND           |
| <i>In-Vitro</i> LP apoA-I OCN | yes          |
| <i>In-Vitro</i> LP apoA-I MPO | ND           |

**Figure S13: Annotated MS/MS spectrum and table of fragmentation ions for carbamylated apoA-I peptide VKAK<sub>96</sub>(carbamyl)VQPYLD.** Human apoA-I was either recovered via immunoprecipitation from homogenized human atherosclerotic aorta (Human plaque), or recombinant human apoA-I (lipid poor (LP) vs within rHDL) was exposed to the indicated *in vitro* carbamylation systems. ApoA-I was then subjected to proteolysis and proteomics analyses as described under Experimental Procedures. Top - CID spectrum for the indicated apoA-I peptide sequence harboring a carbamyllysine residue. Middle – Fragmentation table of peptide ions. Bottom – Table stating whether the carbamyllysine (K+43)-harboring apoA-I peptide was observed either in apoA-I recovered from human plaque or within the indicated *in vitro* carbamylated apoA-I samples.

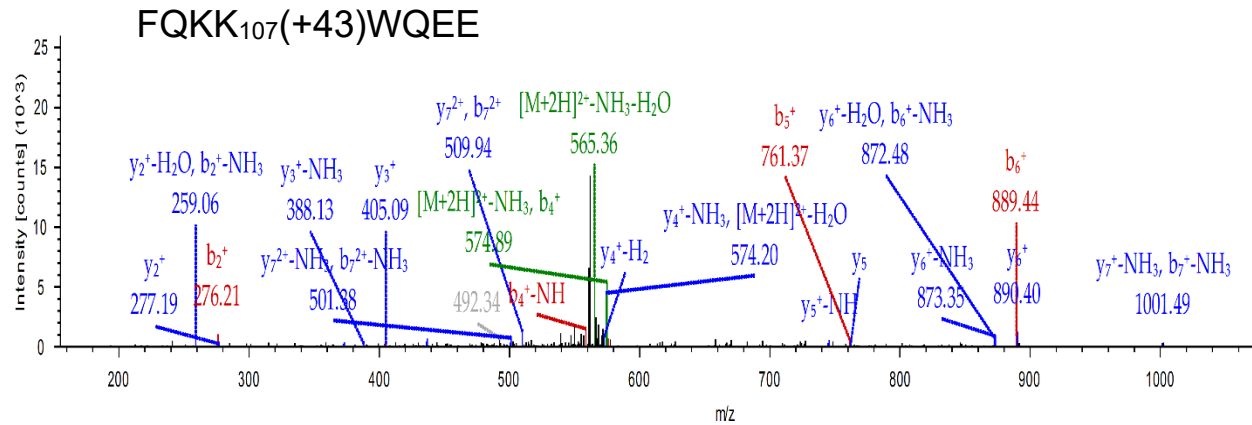

| #1 | b <sup>+</sup> | b <sup>2+</sup> | Seq.       | y <sup>+</sup> | y <sup>2+</sup> | #2 |
|----|----------------|-----------------|------------|----------------|-----------------|----|
| 1  | 148.07569      | 74.54148        | F          |                |                 | 8  |
| 2  | 276.13427      | 138.57077       | Q          | 1018.49524     | 509.75126       | 7  |
| 3  | 404.22923      | 202.61825       | K          | 890.43666      | 445.72197       | 6  |
| 4  | 575.33001      | 288.16864       | K-Carbamyl | 762.34169      | 381.67449       | 5  |
| 5  | 761.40932      | 381.20830       | W          | 591.24092      | 296.12410       | 4  |
| 6  | 889.46790      | 445.23759       | Q          | 405.16160      | 203.08444       | 3  |
| 7  | 1018.51049     | 509.75888       | E          | 277.10303      | 139.05515       | 2  |
| 8  |                |                 | E          | 148.06043      | 74.53386        | 1  |

| Sample:                       | Observed in: |
|-------------------------------|--------------|
| Human plaque                  | yes          |
| <i>In-Vitro</i> rHDL OCN      | ND           |
| <i>In-Vitro</i> rHDL MPO      | ND           |
| <i>In-Vitro</i> LP apoA-I OCN | yes          |
| <i>In-Vitro</i> LP apoA-I MPO | ND           |

**Figure S14: Annotated MS/MS spectrum and table of fragmentation ions for carbamylated apoA-I peptide FQKK<sub>107</sub>(carbamyl)WQEE.** Human apoA-I was either recovered via immunoprecipitation from homogenized human atherosclerotic aorta (Human plaque), or recombinant human apoA-I (lipid poor (LP) vs within rHDL) was exposed to the indicated *in vitro* carbamylation systems. ApoA-I was then subjected to proteolysis and proteomics analyses as described under Experimental Procedures. Top - CID spectrum for the indicated apoA-I peptide sequence harboring a carbamyllysine residue. Middle – Fragmentation table of peptide ions. Bottom – Table stating whether the carbamyllysine (K+43)-harboring apoA-I peptide was observed either in apoA-I recovered from human plaque or within the indicated *in vitro* carbamylated apoA-I samples.



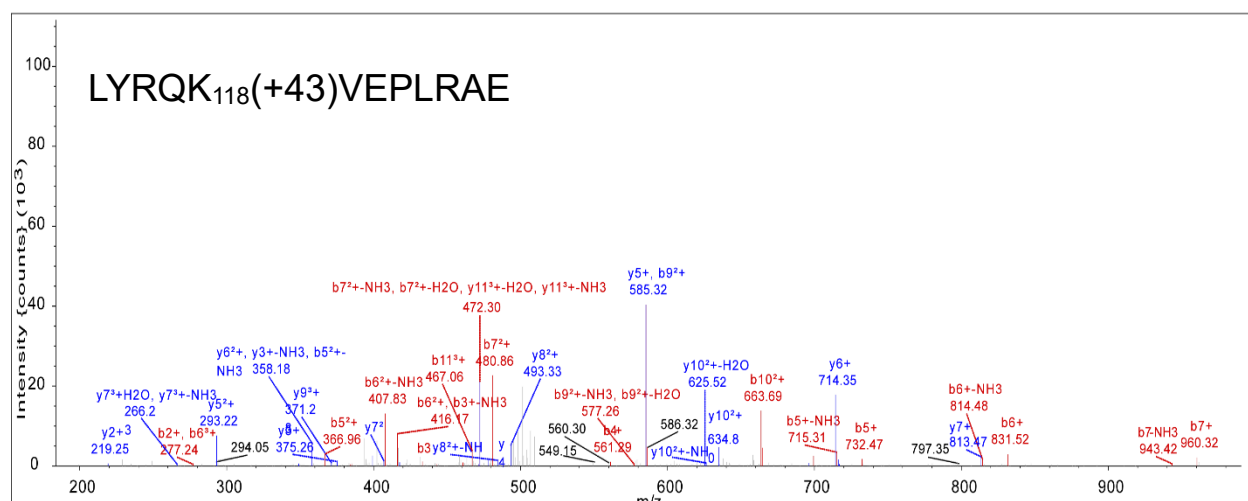

| #1 | b <sup>+</sup> | b <sup>2+</sup> | Seq.       | y <sup>+</sup> | y <sup>2+</sup> | #2 |
|----|----------------|-----------------|------------|----------------|-----------------|----|
| 1  | 114.09134      | 57.54931        | L          |                |                 | 12 |
| 2  | 277.15467      | 139.08097       | Y          | 1431.77029     | 716.38878       | 11 |
| 3  | 433.25578      | 217.13153       | R          | 1268.70696     | 634.85712       | 10 |
| 4  | 561.31436      | 281.16082       | Q          | 1112.60585     | 556.80656       | 9  |
| 5  | 732.41513      | 366.71121       | K-Carbamyl | 984.54727      | 492.77727       | 8  |
| 6  | 831.48355      | 416.24541       | V          | 813.44649      | 407.22689       | 7  |
| 7  | 960.52614      | 480.76671       | E          | 714.37808      | 357.69268       | 6  |
| 8  | 1057.57891     | 529.29309       | P          | 585.33549      | 293.17138       | 5  |
| 9  | 1170.66297     | 585.83512       | L          | 488.28272      | 244.64500       | 4  |
| 10 | 1326.76408     | 663.88568       | R          | 375.19866      | 188.10297       | 3  |
| 11 | 1397.80119     | 699.40424       | A          | 219.09755      | 110.05241       | 2  |
| 12 |                |                 | E          | 148.06043      | 74.53386        | 1  |

| Sample:                       | Observed in: |
|-------------------------------|--------------|
| Human plaque                  | yes          |
| <i>In-Vitro</i> rHDL OCN      | ND           |
| <i>In-Vitro</i> rHDL MPO      | ND           |
| <i>In-Vitro</i> LP apoA-I OCN | yes          |
| <i>In-Vitro</i> LP apoA-I MPO | ND           |

**Figure S15: Annotated MS/MS spectrum and table of fragmentation ions for carbamylated apoA-I peptide LYRQK<sub>118</sub>(carbamyl)VEPLRAE.** Human apoA-I was either recovered via immunoprecipitation from homogenized human atherosclerotic aorta (Human plaque), or recombinant human apoA-I (lipid poor (LP) vs within rHDL) was exposed to the indicated *in vitro* carbamylation systems. ApoA-I was then subjected to proteolysis and proteomics analyses as described under Experimental Procedures. Top - CID spectrum for the indicated apoA-I peptide sequence harboring a carbamyllysine residue. Middle – Fragmentation table of peptide ions. Bottom – Table stating whether the carbamyllysine (K+43)-harboring apoA-I peptide was observed either in apoA-I recovered from human plaque or within the indicated *in vitro* carbamylated apoA-I samples.

## LQEK<sub>140</sub>(+43)LSPLGEE

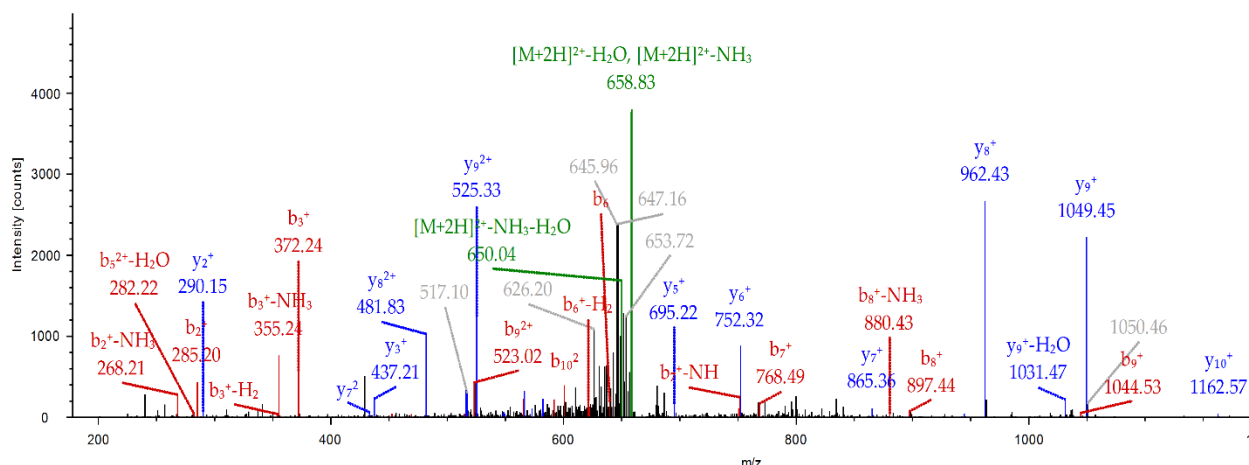

| #1 | b <sup>+</sup> | b <sup>2+</sup> | Seq.       | y <sup>+</sup> | y <sup>2+</sup> | #2 |
|----|----------------|-----------------|------------|----------------|-----------------|----|
| 1  | 114.09134      | 57.54931        | L          |                |                 | 11 |
| 2  | 242.14992      | 121.57860       | Q          | 1172.57936     | 586.79332       | 10 |
| 3  | 371.19251      | 186.09989       | E          | 1044.52078     | 522.76403       | 9  |
| 4  | 542.29329      | 271.65028       | K-Carbamyl | 915.47819      | 458.24273       | 8  |
| 5  | 655.37735      | 328.19231       | L          | 744.37741      | 372.69234       | 7  |
| 6  | 742.40938      | 371.70833       | S          | 631.29335      | 316.15031       | 6  |
| 7  | 839.46214      | 420.23471       | P          | 544.26132      | 272.63430       | 5  |
| 8  | 952.54621      | 476.77674       | L          | 447.20855      | 224.10792       | 4  |
| 9  | 1009.56767     | 505.28747       | G          | 334.12449      | 167.56588       | 3  |
| 10 | 1138.61026     | 569.80877       | E          | 277.10303      | 139.05515       | 2  |
| 11 |                |                 | E          | 148.06043      | 74.53386        | 1  |

| Sample:                       | Observed in: |
|-------------------------------|--------------|
| Human plaque                  | yes          |
| <i>In-Vitro</i> rHDL OCN      | ND           |
| <i>In-Vitro</i> rHDL MPO      | ND           |
| <i>In-Vitro</i> LP apoA-I OCN | ND           |
| <i>In-Vitro</i> LP apoA-I MPO | ND           |

**Figure S16: Annotated MS/MS spectrum and table of fragmentation ions for carbamylated apoA-I peptide LQEK<sub>140</sub>(carbamyl)LSPLGEE.** Human apoA-I was either recovered via immunoprecipitation from homogenized human atherosclerotic aorta (Human plaque), or recombinant human apoA-I (lipid poor (LP) vs within rHDL) was exposed to the indicated *in vitro* carbamylation systems. ApoA-I was then subjected to proteolysis and proteomics analyses as described under Experimental Procedures. Top - CID spectrum for the indicated apoA-I peptide sequence harboring a carbamyllysine residue. Middle – Fragmentation table of peptide ions. Bottom – Table stating whether the carbamyllysine (K+43)-harboring apoA-I peptide was observed either in apoA-I recovered from human plaque or within the indicated *in vitro* carbamylated apoA-I samples.

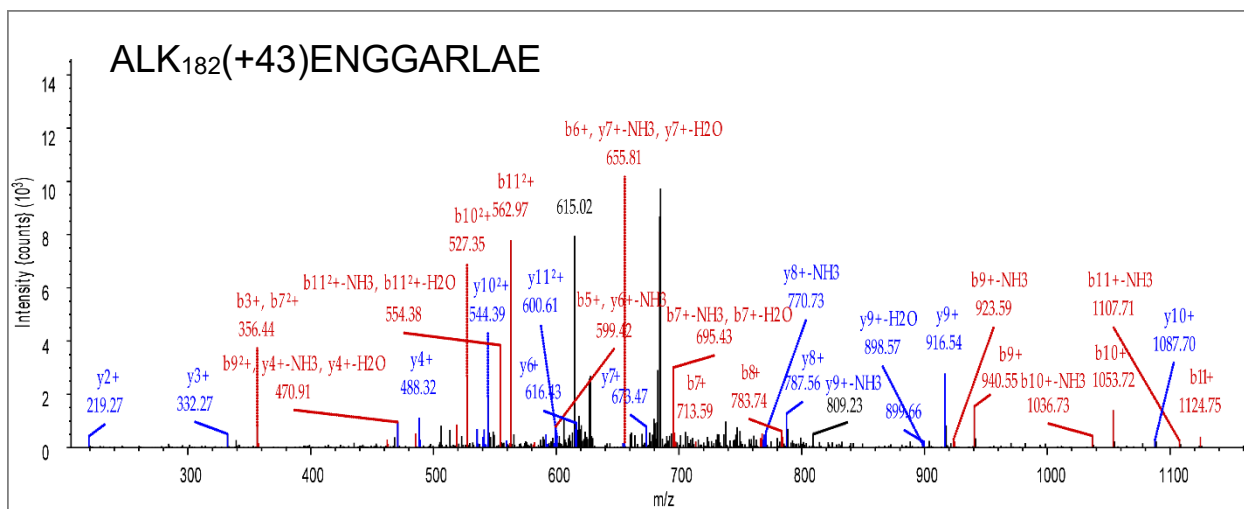

| #1 | b <sup>+</sup> | b <sup>2+</sup> | Seq.       | y <sup>+</sup> | y <sup>2+</sup> | #2 |
|----|----------------|-----------------|------------|----------------|-----------------|----|
| 1  | 72.04439       | 36.52583        | A          |                |                 | 12 |
| 2  | 185.12845      | 93.06787        | L          | 1200.63313     | 600.82020       | 11 |
| 3  | 356.22923      | 178.61825       | K-Carbamyl | 1087.54906     | 544.27817       | 10 |
| 4  | 485.27182      | 243.13955       | E          | 916.44828      | 458.72778       | 9  |
| 5  | 599.31475      | 300.16101       | N          | 787.40569      | 394.20648       | 8  |
| 6  | 656.33622      | 328.67175       | G          | 673.36276      | 337.18502       | 7  |
| 7  | 713.35768      | 357.18248       | G          | 616.34130      | 308.67429       | 6  |
| 8  | 784.39479      | 392.70103       | A          | 559.31984      | 280.16356       | 5  |
| 9  | 940.49590      | 470.75159       | R          | 488.28272      | 244.64500       | 4  |
| 10 | 1053.57997     | 527.29362       | L          | 332.18161      | 166.59444       | 3  |
| 11 | 1124.61708     | 562.81218       | A          | 219.09755      | 110.05241       | 2  |
| 12 |                |                 | E          | 148.06043      | 74.53386        | 1  |

| Sample:                       | Observed in: |
|-------------------------------|--------------|
| Human plaque                  | yes          |
| <i>In-Vitro</i> rHDL OCN      | yes          |
| <i>In-Vitro</i> rHDL MPO      | ND           |
| <i>In-Vitro</i> LP apoA-I OCN | ND           |
| <i>In-Vitro</i> LP apoA-I MPO | ND           |

**Figure S17: Annotated MS/MS spectrum and table of fragmentation ions for carbamylated apoA-I peptide ALK<sub>182</sub>(carbamyl)ENGGARLAE.** Human apoA-I was either recovered via immunoprecipitation from homogenized human atherosclerotic aorta (Human plaque), or recombinant human apoA-I (lipid pool (LP) vs within rHDL) was exposed to the indicated *in vitro* carbamylation systems. ApoA-I was then subjected to proteolysis and proteomics analyses as described under Experimental Procedures. Top - CID spectrum for the indicated apoA-I peptide sequence harboring a carbamyllysine residue. Middle - Fragmentation table of peptide ions. Bottom - Table stating whether the carbamyllysine (K+43)-harboring apoA-I peptide was observed either in apoA-I recovered from human plaque or within the indicated *in vitro* carbamylated apoA-I samples.

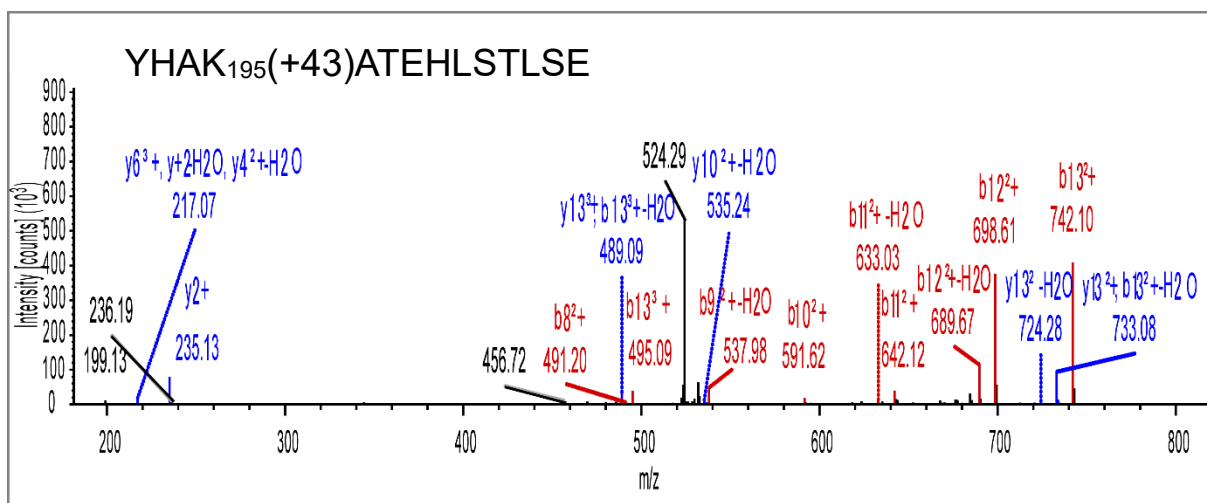

| #1 | b <sup>+</sup> | b <sup>2+</sup> | b <sup>3+</sup> | Seq.       | y <sup>+</sup> | y <sup>2+</sup> | y <sup>3+</sup> | #2 |
|----|----------------|-----------------|-----------------|------------|----------------|-----------------|-----------------|----|
| 1  | 164.07061      | 82.53894        | 55.36172        | Y          |                |                 |                 | 14 |
| 2  | 301.12952      | 151.06840       | 101.04802       | H          | 1466.72340     | 733.86534       | 489.57932       | 13 |
| 3  | 372.16663      | 186.58695       | 124.72706       | A          | 1329.66448     | 665.33588       | 443.89301       | 12 |
| 4  | 543.26741      | 272.13734       | 181.76065       | K-Carbamyl | 1258.62737     | 629.81732       | 420.21397       | 11 |
| 5  | 614.30452      | 307.65590       | 205.43969       | A          | 1087.52659     | 544.26694       | 363.18038       | 10 |
| 6  | 715.35220      | 358.17974       | 239.12225       | T          | 1016.48948     | 508.74838       | 339.50134       | 9  |
| 7  | 844.39479      | 422.70103       | 282.13645       | E          | 915.44180      | 458.22454       | 305.81879       | 8  |
| 8  | 981.45370      | 491.23049       | 327.82275       | H          | 786.39921      | 393.70324       | 262.80459       | 7  |
| 9  | 1094.53777     | 547.77252       | 365.51744       | L          | 649.34030      | 325.17379       | 217.11828       | 6  |
| 10 | 1181.56980     | 591.28854       | 394.52812       | S          | 536.25623      | 268.63175       | 179.42360       | 5  |
| 11 | 1282.61748     | 641.81238       | 428.21068       | T          | 449.22420      | 225.11574       | 150.41292       | 4  |
| 12 | 1395.70154     | 698.35441       | 465.90536       | L          | 348.17653      | 174.59190       | 116.73036       | 3  |
| 13 | 1482.73357     | 741.87042       | 494.91604       | S          | 235.09246      | 118.04987       | 79.03567        | 2  |
| 14 |                |                 |                 | E          | 148.06043      | 74.53386        | 50.02500        | 1  |

| Sample:                       | Observed in: |
|-------------------------------|--------------|
| Human plaque                  | ND           |
| <i>In-Vitro</i> rHDL OCN      | ND           |
| <i>In-Vitro</i> rHDL MPO      | yes          |
| <i>In-Vitro</i> LP apoA-I OCN | yes          |
| <i>In-Vitro</i> LP apoA-I MPO | yes          |

**Figure S18: Annotated MS/MS spectrum and table of fragmentation ions for carbamylated apoA-I peptide YHAK<sub>195</sub>(carbamyl)ATEHLSTLSE.** Human apoA-I was either recovered via immunoprecipitation from homogenized human atherosclerotic aorta (Human plaque), or recombinant human apoA-I (lipid poor (LP) vs within rHDL) was exposed to the indicated *in vitro* carbamylation systems. ApoA-I was then subjected to proteolysis and proteomics analyses as described under Experimental Procedures. Top - CID spectrum for the indicated apoA-I peptide sequence harboring a carbamyllysine residue. Middle – Fragmentation table of peptide ions. Bottom – Table stating whether the carbamyllysine (K+43)-harboring apoA-I peptide was observed either in apoA-I recovered from human plaque or within the indicated *in vitro* carbamylated apoA-I samples.

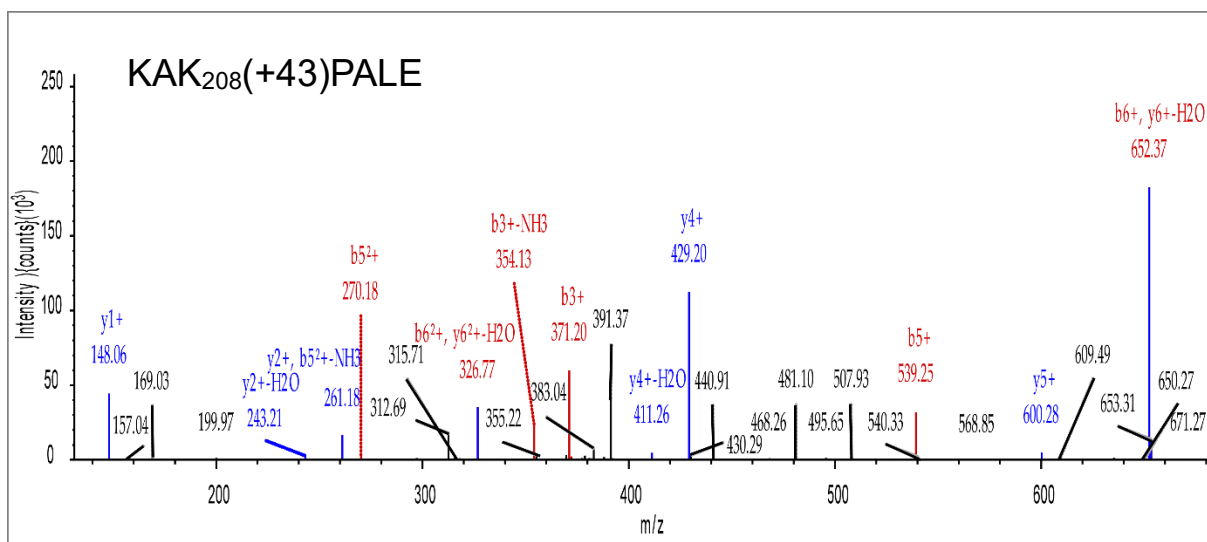

| #1 | b <sup>+</sup> | b <sup>2+</sup> | Seq.       | y <sup>+</sup> | y <sup>2+</sup> | #2 |
|----|----------------|-----------------|------------|----------------|-----------------|----|
| 1  | 129.10224      | 65.05476        | K          |                |                 | 7  |
| 2  | 200.13935      | 100.57331       | A          | 671.37227      | 336.18977       | 6  |
| 3  | 371.24013      | 186.12370       | K-Carbamyl | 600.33515      | 300.67121       | 5  |
| 4  | 468.29289      | 234.65009       | P          | 429.23438      | 215.12083       | 4  |
| 5  | 539.33001      | 270.16864       | A          | 332.18161      | 166.59444       | 3  |
| 6  | 652.41407      | 326.71067       | L          | 261.14450      | 131.07589       | 2  |
| 7  |                |                 | E          | 148.06043      | 74.53386        | 1  |

| Sample:                       | Observed in: |
|-------------------------------|--------------|
| Human plaque                  | yes          |
| <i>In-Vitro</i> rHDL OCN      | ND           |
| <i>In-Vitro</i> rHDL MPO      | ND           |
| <i>In-Vitro</i> LP apoA-I OCN | ND           |
| <i>In-Vitro</i> LP apoA-I MPO | ND           |

**Figure S19: Annotated MS/MS spectrum and table of fragmentation ions for carbamylated apoA-I peptide KAK<sub>208</sub>(carbamyl)PALE.** Human apoA-I was either recovered via immunoprecipitation from homogenized human atherosclerotic aorta (Human plaque), or recombinant human apoA-I (lipid poor (LP) vs within rHDL) was exposed to the indicated *in vitro* carbamylation systems. ApoA-I was then subjected to proteolysis and proteomics analyses as described under Experimental Procedures. Top - CID spectrum for the indicated apoA-I peptide sequence harboring a carbamyllysine residue. Middle – Fragmentation table of peptide ions. Bottom – Table stating whether the carbamyllysine (K+43)-harboring apoA-I peptide was observed either in apoA-I recovered from human plaque or within the indicated *in vitro* carbamylated apoA-I samples.

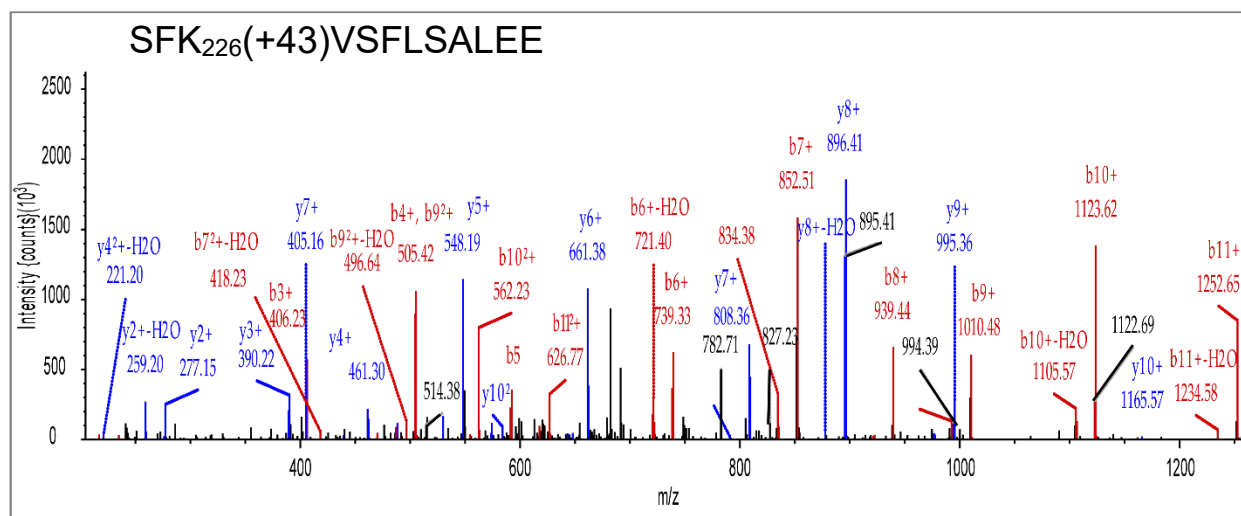

| #1 | b <sup>+</sup> | b <sup>2+</sup> | Seq.       | y <sup>+</sup> | y <sup>2+</sup> | #2 |
|----|----------------|-----------------|------------|----------------|-----------------|----|
| 1  | 88.03930       | 44.52329        | S          |                |                 | 12 |
| 2  | 235.10772      | 118.05750       | F          | 1312.67834     | 656.84281       | 11 |
| 3  | 406.20850      | 203.60789       | K-Carbamyl | 1165.60993     | 583.30860       | 10 |
| 4  | 505.27691      | 253.14209       | V          | 994.50915      | 497.75821       | 9  |
| 5  | 592.30894      | 296.65811       | S          | 895.44074      | 448.22401       | 8  |
| 6  | 739.37735      | 370.19231       | F          | 808.40871      | 404.70799       | 7  |
| 7  | 852.46142      | 426.73435       | L          | 661.34030      | 331.17379       | 6  |
| 8  | 939.49344      | 470.25036       | S          | 548.25623      | 274.63175       | 5  |
| 9  | 1010.53056     | 505.76892       | A          | 461.22420      | 231.11574       | 4  |
| 10 | 1123.61462     | 562.31095       | L          | 390.18709      | 195.59718       | 3  |
| 11 | 1252.65721     | 626.83225       | E          | 277.10303      | 139.05515       | 2  |
| 12 |                |                 | E          | 148.06043      | 74.53386        | 1  |

| Sample:                       | Observed in: |
|-------------------------------|--------------|
| Human plaque                  | yes          |
| <i>In-Vitro</i> rHDL OCN      | yes          |
| <i>In-Vitro</i> rHDL MPO      | yes          |
| <i>In-Vitro</i> LP apoA-I OCN | yes          |
| <i>In-Vitro</i> LP apoA-I MPO | ND           |

**Figure S20: Annotated MS/MS spectrum and table of fragmentation ions for carbamylated apoA-I peptide SFK<sub>226</sub>(carbamyl)VSFLSALEE.** Human apoA-I was either recovered via immunoprecipitation from homogenized human atherosclerotic aorta (Human plaque), or recombinant human apoA-I (lipid poor (LP) vs within rHDL) was exposed to the indicated *in vitro* carbamylation systems. ApoA-I was then subjected to proteolysis and proteomics analyses as described under Experimental Procedures. Top - CID spectrum for the indicated apoA-I peptide sequence harboring a carbamyllysine residue. Middle – Fragmentation table of peptide ions. Bottom – Table stating whether the carbamyllysine (K+43)-harboring apoA-I peptide was observed either in apoA-I recovered from human plaque or within the indicated *in vitro* carbamylated apoA-I samples.

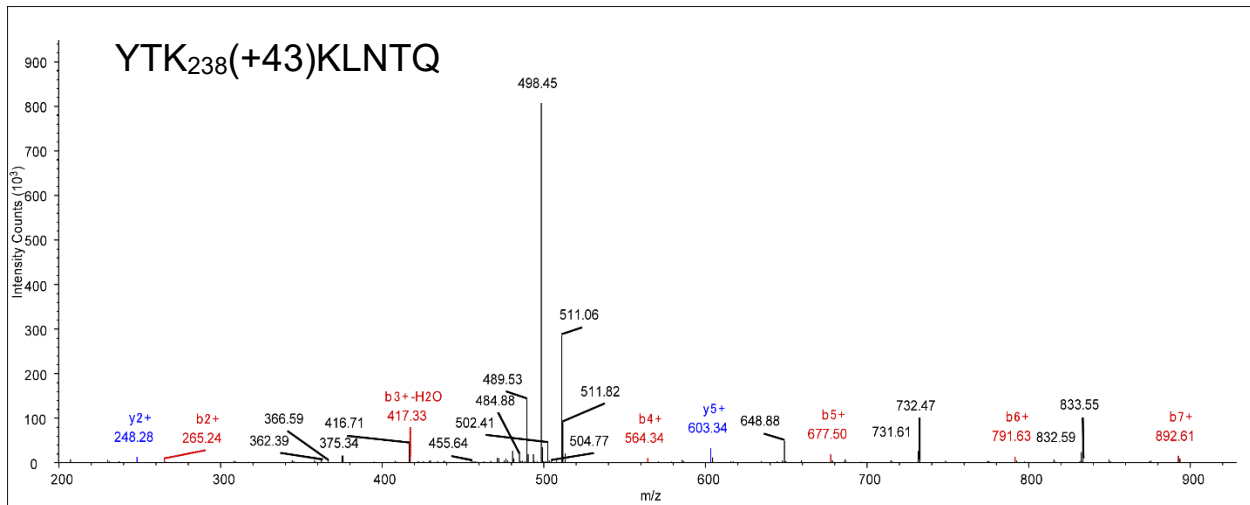

| #1 | b <sup>+</sup> | b <sup>2+</sup> | Seq.       | y <sup>+</sup> | y <sup>2+</sup> | #2 |
|----|----------------|-----------------|------------|----------------|-----------------|----|
| 1  | 164.07061      | 82.53894        | Y          |                |                 | 8  |
| 2  | 265.11828      | 133.06278       | T          | 875.49451      | 438.25089       | 7  |
| 3  | 436.21906      | 218.61317       | K-Carbamyl | 774.44683      | 387.72705       | 6  |
| 4  | 564.31402      | 282.66065       | K          | 603.34605      | 302.17666       | 5  |
| 5  | 677.39809      | 339.20268       | L          | 475.25109      | 238.12918       | 4  |
| 6  | 791.44101      | 396.22415       | N          | 362.16702      | 181.58715       | 3  |
| 7  | 892.48869      | 446.74798       | T          | 248.12410      | 124.56569       | 2  |
| 8  |                |                 | Q          | 147.07642      | 74.04185        | 1  |

| Sample:                       | Observed in: |
|-------------------------------|--------------|
| Human plaque                  | yes          |
| <i>In-Vitro</i> rHDL OCN      | ND           |
| <i>In-Vitro</i> rHDL MPO      | yes          |
| <i>In-Vitro</i> LP apoA-I OCN | ND           |
| <i>In-Vitro</i> LP apoA-I MPO | ND           |

**Figure S21: Annotated MS/MS spectrum and table of fragmentation ions for carbamylated apoA-I peptide YTK<sub>238</sub>(carbamyl)KLNTQ.** Human apoA-I was either recovered via immunoprecipitation from homogenized human atherosclerotic aorta (Human plaque), or recombinant human apoA-I (lipid poor (LP) vs within rHDL) was exposed to the indicated *in vitro* carbamylation systems. ApoA-I was then subjected to proteolysis and proteomics analyses as described under Experimental Procedures. Top - CID spectrum for the indicated apoA-I peptide sequence harboring a carbamyllysine residue. Middle – Fragmentation table of peptide ions. Bottom – Table stating whether the carbamyllysine (K+43)-harboring apoA-I peptide was observed either in apoA-I recovered from human plaque or within the indicated *in vitro* carbamylated apoA-I samples.

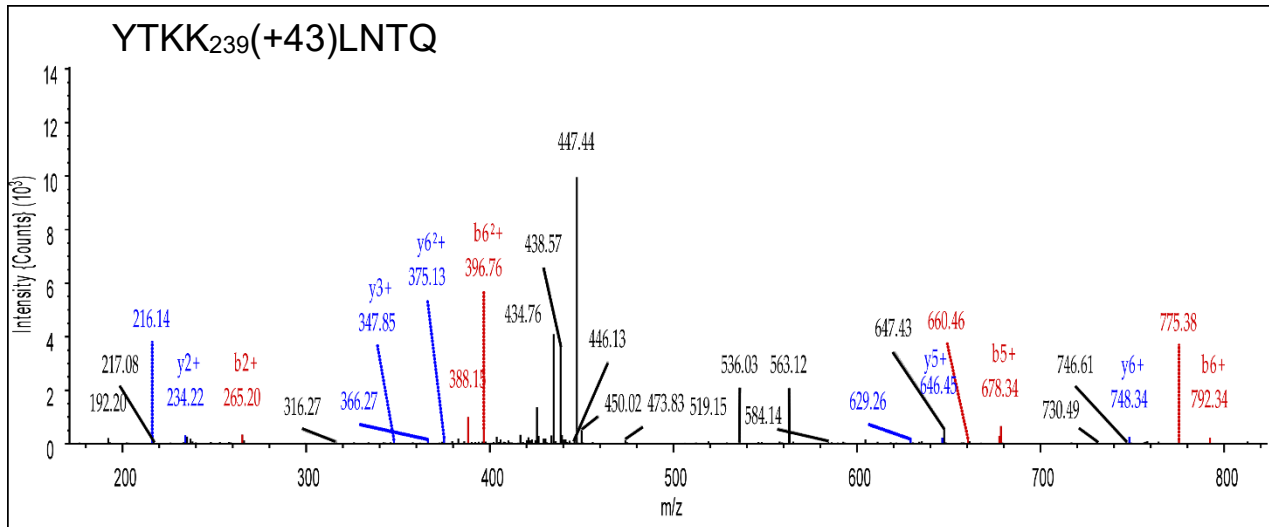

| #1 | b <sup>+</sup> | b <sup>2+</sup> | Seq.       | y <sup>+</sup> | y <sup>2+</sup> | #2 |
|----|----------------|-----------------|------------|----------------|-----------------|----|
| 1  | 164.07061      | 82.53894        | Y          |                |                 | 8  |
| 2  | 265.11828      | 133.06278       | T          | 875.49451      | 438.25089       | 7  |
| 3  | 393.21325      | 197.11026       | K          | 774.44683      | 387.72705       | 6  |
| 4  | 564.31402      | 282.66065       | K-Carbamyl | 646.35187      | 323.67957       | 5  |
| 5  | 677.39809      | 339.20268       | L          | 475.25109      | 238.12918       | 4  |
| 6  | 791.44101      | 396.22415       | N          | 362.16702      | 181.58715       | 3  |
| 7  | 892.48869      | 446.74798       | T          | 248.12410      | 124.56569       | 2  |
| 8  |                |                 | Q          | 147.07642      | 74.04185        | 1  |

| Sample:                       | Observed in: |
|-------------------------------|--------------|
| Human plaque                  | yes          |
| <i>In-Vitro</i> rHDL OCN      | yes          |
| <i>In-Vitro</i> rHDL MPO      | ND           |
| <i>In-Vitro</i> LP apoA-I OCN | ND           |
| <i>In-Vitro</i> LP apoA-I MPO | ND           |

**Figure S22: Annotated MS/MS spectrum and table of fragmentation ions for carbamylated apoA-I peptide YTKK<sub>239</sub> (carbamyl)LNTQ.** Human apoA-I was either recovered via immunoprecipitation from homogenized human atherosclerotic aorta (Human plaque), or recombinant human apoA-I (lipid poor (LP) vs within rHDL) was exposed to the indicated *in vitro* carbamylation systems. ApoA-I was then subjected to proteolysis and proteomics analyses as described under Experimental Procedures. Top - CID spectrum for the indicated apoA-I peptide sequence harboring a carbamyllysine residue. Middle – Fragmentation table of peptide ions. Bottom – Table stating whether the carbamyllysine (K+43)-harboring apoA-I peptide was observed either in apoA-I recovered from human plaque or within the indicated *in vitro* carbamylated apoA-I samples.



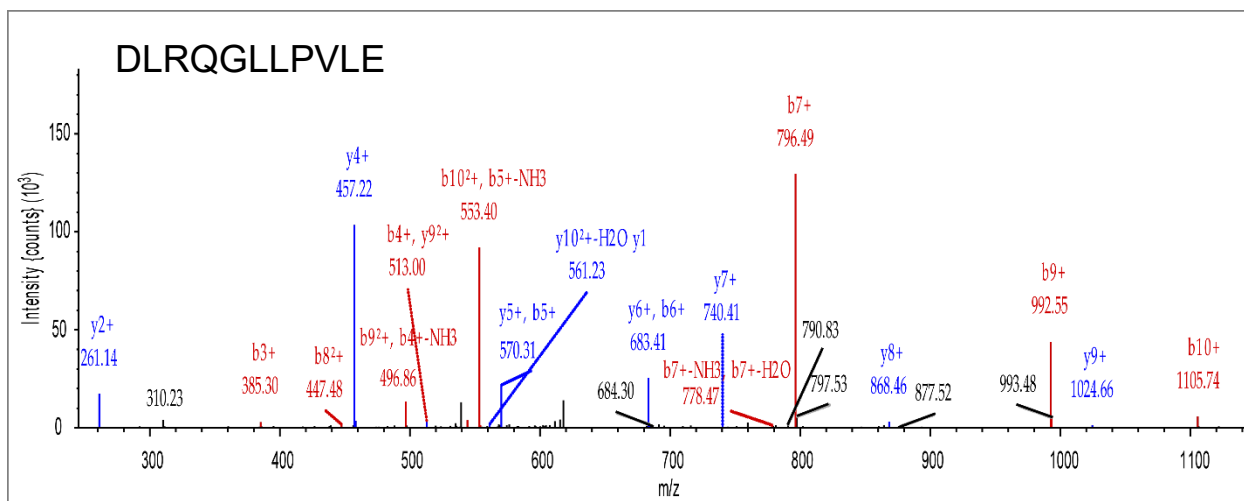

| #1 | b <sup>+</sup> | b <sup>2+</sup> | Seq. | y <sup>+</sup> | y <sup>2+</sup> | #2 |
|----|----------------|-----------------|------|----------------|-----------------|----|
| 1  | 116.03422      | 58.52075        | D    |                |                 | 11 |
| 2  | 229.11828      | 115.06278       | L    | 1137.69902     | 569.35315       | 10 |
| 3  | 385.21939      | 193.11334       | R    | 1024.61496     | 512.81112       | 9  |
| 4  | 513.27797      | 257.14262       | Q    | 868.51384      | 434.76056       | 8  |
| 5  | 570.29944      | 285.65336       | G    | 740.45527      | 370.73127       | 7  |
| 6  | 683.38350      | 342.19539       | L    | 683.43380      | 342.22054       | 6  |
| 7  | 796.46756      | 398.73742       | L    | 570.34974      | 285.67851       | 5  |
| 8  | 893.52033      | 447.26380       | P    | 457.26568      | 229.13648       | 4  |
| 9  | 992.58874      | 496.79801       | V    | 360.21291      | 180.61009       | 3  |
| 10 | 1105.67281     | 553.34004       | L    | 261.14450      | 131.07589       | 2  |
| 11 |                |                 | E    | 148.06043      | 74.53386        | 1  |

| Sample:                       | Observed in: |
|-------------------------------|--------------|
| Human plaque                  | yes          |
| <i>In-Vitro</i> rHDL OCN      | yes          |
| <i>In-Vitro</i> rHDL MPO      | yes          |
| <i>In-Vitro</i> LP apoA-I OCN | yes          |
| <i>In-Vitro</i> LP apoA-I MPO | yes          |

**Figure S23: Annotated MS/MS spectrum and table of fragmentation ions for apoA-I reference peptide DLRQGLLPVLE.** Human apoA-I was either recovered via immunoprecipitation from homogenized human atherosclerotic aorta (Human plaque), or recombinant human apoA-I (lipid poor (LP) vs within rHDL) was exposed to the indicated *in vitro* carbamylation systems. ApoA-I was then subjected to proteolysis and proteomics analyses as described under Experimental Procedures. Top - CID spectrum for the indicated apoA-I reference peptide sequence. Middle – Fragmentation table of peptide ions. Bottom – Table stating whether the apoA-I reference peptide was observed either in apoA-I recovered from human plaque or within the indicated *in vitro* carbamylated apoA-I samples.

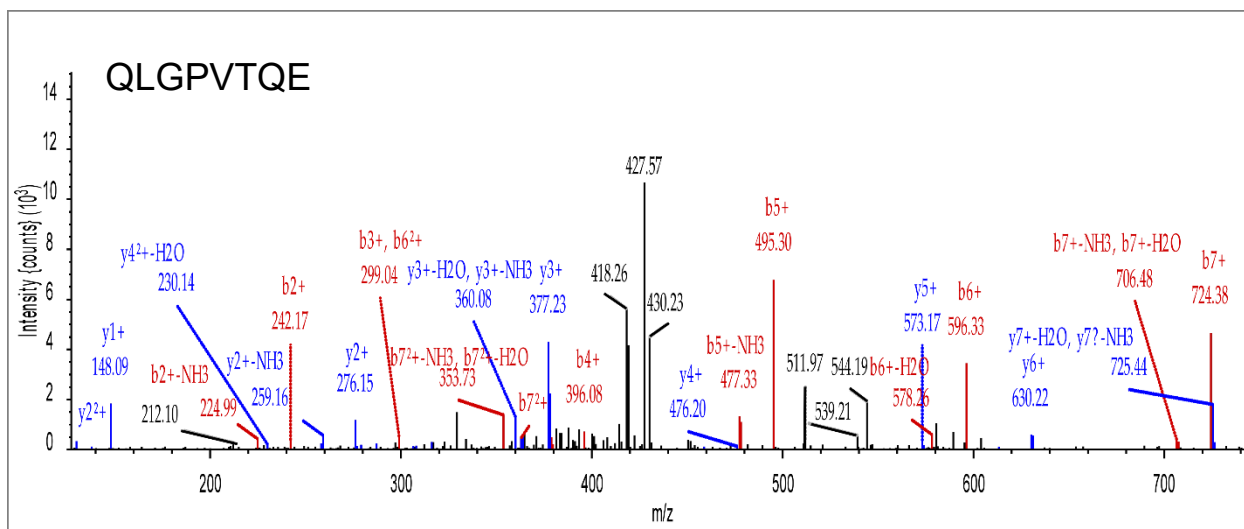

| #1 | b <sup>+</sup> | b <sup>2+</sup> | Seq. | y <sup>+</sup> | y <sup>2+</sup> | #2 |
|----|----------------|-----------------|------|----------------|-----------------|----|
| 1  | 129.06585      | 65.03657        | Q    |                |                 | 8  |
| 2  | 242.14992      | 121.57860       | L    | 743.39340      | 372.20034       | 7  |
| 3  | 299.17138      | 150.08933       | G    | 630.30933      | 315.65830       | 6  |
| 4  | 396.22415      | 198.61571       | P    | 573.28787      | 287.14757       | 5  |
| 5  | 495.29256      | 248.14992       | V    | 476.23510      | 238.62119       | 4  |
| 6  | 596.34024      | 298.67376       | T    | 377.16669      | 189.08698       | 3  |
| 7  | 724.39882      | 362.70305       | Q    | 276.11901      | 138.56314       | 2  |
| 8  |                |                 | E    | 148.06043      | 74.53386        | 1  |

| Sample:                       | Observed in: |
|-------------------------------|--------------|
| Human plaque                  | yes          |
| <i>In-Vitro</i> rHDL OCN      | ND           |
| <i>In-Vitro</i> rHDL MPO      | ND           |
| <i>In-Vitro</i> LP apoA-I OCN | yes          |
| <i>In-Vitro</i> LP apoA-I MPO | yes          |

**Figure S24: Annotated MS/MS spectrum and table of fragmentation ions for apoA-I reference peptide QLGPVTQE.** Human apoA-I was either recovered via immunoprecipitation from homogenized human atherosclerotic aorta (Human plaque), or recombinant human apoA-I (lipid poor (LP) vs within rHDL) was exposed to the indicated *in vitro* carbamylation systems. ApoA-I was then subjected to proteolysis and proteomics analyses as described under Experimental Procedures. Top - CID spectrum for the indicated apoA-I reference peptide sequence. Middle – Fragmentation table of peptide ions. Bottom – Table stating whether the apoA-I reference peptide was observed either in apoA-I recovered from human plaque or within the indicated *in vitro* carbamylated apoA-I samples.

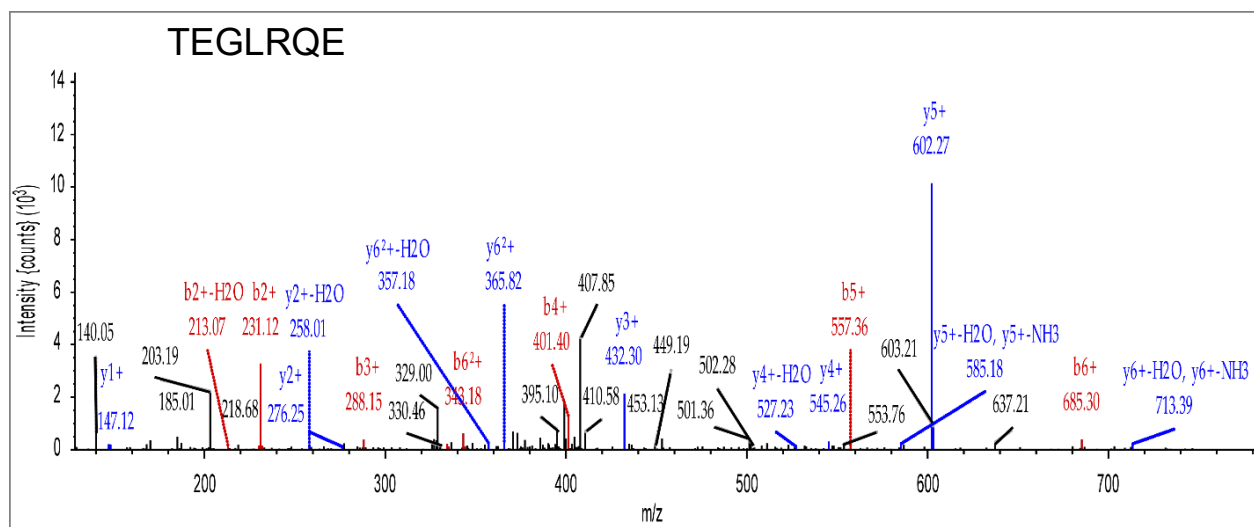

| #1 | b <sup>+</sup> | b <sup>2+</sup> | Seq. | y <sup>+</sup> | y <sup>2+</sup> | #2 |
|----|----------------|-----------------|------|----------------|-----------------|----|
| 1  | 102.05496      | 51.53112        | T    |                |                 | 7  |
| 2  | 231.09755      | 116.05241       | E    | 731.36824      | 366.18776       | 6  |
| 3  | 288.11901      | 144.56314       | G    | 602.32565      | 301.66646       | 5  |
| 4  | 401.20308      | 201.10518       | L    | 545.30419      | 273.15573       | 4  |
| 5  | 557.30419      | 279.15573       | R    | 432.22012      | 216.61370       | 3  |
| 6  | 685.36276      | 343.18502       | Q    | 276.11901      | 138.56314       | 2  |
| 7  |                |                 | E    | 148.06043      | 74.53386        | 1  |

| Sample:                       | Observed in: |
|-------------------------------|--------------|
| Human plaque                  | ND           |
| <i>In-Vitro</i> rHDL OCN      | yes          |
| <i>In-Vitro</i> rHDL MPO      | yes          |
| <i>In-Vitro</i> LP apoA-I OCN | ND           |
| <i>In-Vitro</i> LP apoA-I MPO | ND           |

**Figure S25: Annotated MS/MS spectrum and table of fragmentation ions for apoA-I reference peptide TEGLRQE.** Human apoA-I was either recovered via immunoprecipitation from homogenized human atherosclerotic aorta (Human plaque), or recombinant human apoA-I (lipid poor (LP) vs within rHDL) was exposed to the indicated *in vitro* carbamylation systems. ApoA-I was then subjected to proteolysis and proteomics analyses as described under Experimental Procedures. Top - CID spectrum for the indicated apoA-I reference peptide sequence. Middle – Fragmentation table of peptide ions. Bottom – Table stating whether the apoA-I reference peptide was observed either in apoA-I recovered from human plaque or within the indicated *in vitro* carbamylated apoA-I samples.

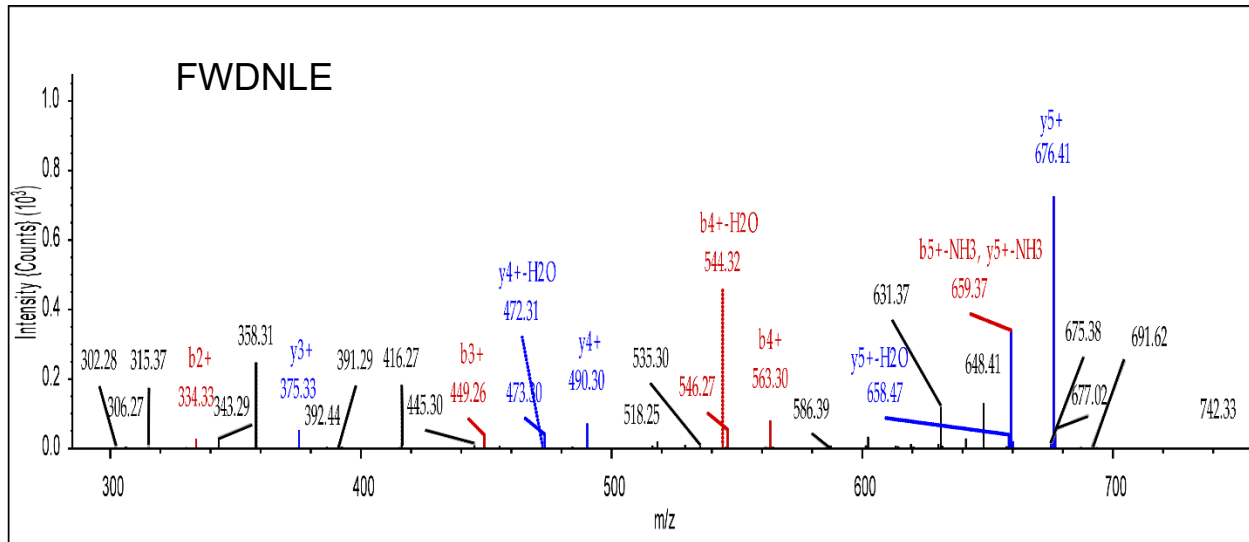

| #1 | b <sup>+</sup> | Seq. | y <sup>+</sup> | #2 |
|----|----------------|------|----------------|----|
| 1  | 148.07569      | F    |                | 6  |
| 2  | 334.15500      | W    | 676.29368      | 5  |
| 3  | 449.18195      | D    | 490.21437      | 4  |
| 4  | 563.22487      | N    | 375.18743      | 3  |
| 5  | 676.30894      | L    | 261.14450      | 2  |
| 6  |                | E    | 148.06043      | 1  |

| Sample:                       | Observed in: |
|-------------------------------|--------------|
| Human plaque                  | ND           |
| <i>In-Vitro</i> rHDL OCN      | ND           |
| <i>In-Vitro</i> rHDL MPO      | ND           |
| <i>In-Vitro</i> LP apoA-I OCN | yes          |
| <i>In-Vitro</i> LP apoA-I MPO | yes          |

**Figure S26: Annotated MS/MS spectrum and table of fragmentation ions for apoA-I reference peptide FWDNLE.** Human apoA-I was either recovered via immunoprecipitation from homogenized human atherosclerotic aorta (Human plaque), or recombinant human apoA-I (lipid poor (LP) vs within rHDL) was exposed to the indicated *in vitro* carbamylation systems. ApoA-I was then subjected to proteolysis and proteomics analyses as described under Experimental Procedures. Top - CID spectrum for the indicated apoA-I reference peptide sequence. Middle – Fragmentation table of peptide ions. Bottom – Table stating whether the apoA-I reference peptide was observed either in apoA-I recovered from human plaque or within the indicated *in vitro* carbamylated apoA-I samples.
